# Supplementary material for: The use of fish diversity and abundance as environmental indicators in a mining region in Brazilian Amazonia
Source: Research Square preprint supplement (doi:10.21203/rs.3.rs-7887845/v1), 2025-11-07
Supplement: Supplementary file 1 [file b286abee0ac142a8b8a57228.docx]

Supplementary Table S1-Locations delimited for the collection of primary data in the Carajás Mineral Province and the criteria applied for the classification of the degree of anthropogenic impact used as a factor used in the analysis of the data collected in May and November 2022.

| Basin/ Degree of impact | Location/Code | Specifications |
| --- | --- | --- |
| Itacaiúnas/Control | REBIO-Tapirapé Biological Reserve/IRT | A fully-protected conservation unit created by federal decree 97.719 of May 5th, 1989. No direct human interference permitted, except actions aimed at the preservation of the direct environment. This reserve is publicly owned and controlled. Public visitation is allowed for educational purposes, following specific regulations. Scientific research depends on prior authorization and is also regulated. |
| Águas Claras River/I-RAC | The collection site is within the Campos Ferruginosos National Park, which was created by federal decree on June 5th, 2017. The collection point is located upstream from the mine. |
| Itacaiúnas /Impacted | Blue River/I-RAZ | A river with reddish water and a large number of illegal mining sites. |
|  | Gray River/I-RCZ | River bordering active iron, copper, and lead mines |
| Parauapebas/Control | Rio das Neves/P-RN | Areas isolated from urban centers, mines, and mine tailings (headwaters in the Serra Norte in the case of the Rio das Neves and in the Serra da Bocaina in the case of Porto do Limão). |
| Porto do Limão/P-PL |
| Parauapebas/Impacted | Igarapé Gelado Environmental Protection Area/P-AIG | Although it is a sustainable-use conservation unit, the bodies of water of this area are used to irrigate farmland and deposit mine tailings. |
| Sossego Mine/P-MS | River that runs through one of the active copper mines in the Carajás Mineral Province. |

Supplementary Table S2 – Total abundance of fish species captured per basin (Itacaiúnas and Parauapebas) and location (impacted and control) in Carajás

| TAXONOMIC GROUP  (CLASS/ORDER/Family/Species) | ITACAIÚNAS | | | | Subtotal IRB | PARAUAPEBAS | | | | Subtotal PRB | Subtotal control | Subtotal impacted | Subtotal Dry | Subtotal Rainy | TOTAL |
| --- | --- | --- | --- | --- | --- | --- | --- | --- | --- | --- | --- | --- | --- | --- | --- |
| Control | | Impacted | | Control | | Impacted | |
|  | Dry | Rainy | Dry | Rainy | Dry | Rainy | Dry | Rainy |
| **ACTINOPTERYGII** |  |  |  |  |  |  |  |  |  |  |  |  |  |  |  |
| CHARACIFORMES |  |  |  |  |  |  |  |  |  |  |  |  |  |  |  |
| **Anostomidae** |  |  |  |  |  |  |  |  |  |  |  |  |  |  |  |
| *Anostomus ternetzi* Fernández-Yépez, 1949 | 0 | 0 | 0 | 0 | 0 | 0 | 1 | 0 | 0 | 1 | 1 | 0 | 0 | 1 | 1 |
| *Leporinus friderici* Bloch, 1974 | 27 | 11 | 3 | 7 | 48 | 3 | 8 | 1 | 0 | 12 | 49 | 11 | 34 | 26 | 60 |
| *Leporellus vittatus* Valenciennes, 1850 | 1 | 0 | 0 | 0 | 1 | 0 | 0 | 0 | 0 | 0 | 1 | 0 | 1 | 0 | 1 |
| *Schizodon vittatus* Valenciennes, 1850 | 6 | 2 | 0 | 0 | 8 | 0 | 0 | 0 | 0 | 0 | 8 | 0 | 6 | 0 | 8 |
| **Bryconidae** |  |  |  |  |  |  |  |  |  |  |  |  |  |  |  |
| *Salminus hilarri* Valenciennes, 1850 | 3 | 2 | 0 | 0 | 5 | 3 | 1 | 0 | 0 | 4 | 9 | 0 | 6 | 3 | 9 |
| **Characidae** |  |  |  |  |  |  |  |  |  |  |  |  |  |  |  |
| *Cynopotamus juruenae* Menezes, 1987 | 0 | 0 | 0 | 0 | 0 | 1 | 0 | 0 | 0 | 1 | 0 | 0 | 1 | 0 | 1 |
| *Moenkhausia cf. sanctaefilomenae* Steindachner, 1907 | 0 | 0 | 0 | 1 | 1 | 0 | 0 | 0 | 0 | 0 | 1 | 0 | 0 | 1 | 1 |
| **Ctenoluciidae** |  |  |  |  |  |  |  |  |  |  |  |  |  |  |  |
| *Boulengerella cuvieri* Spix & Agassiz, 1829 | 0 | 0 | 0 | 0 | 0 | 2 | 4 | 2 | 2 | 10 | 6 | 4 | 4 | 6 | 10 |
| **Cynodontidae** |  |  |  |  |  |  |  |  |  |  |  |  |  |  |  |
| *Hydrolycus tatauaia* Toledo-Piza, Menezes & Santos, 1999 | 33 | 0 | 0 | 0 | 33 | 0 | 0 | 0 | 0 | 0 | 33 | 0 | 33 | 0 | 33 |
| *Raphiodon vulpinus* Spix & Agassiz, 1829 | 0 | 5 | 0 | 0 | 5 | 0 | 0 | 0 | 0 | 0 | 5 | 0 | 0 | 5 | 5 |
| **Erythrinidae** |  |  |  |  |  |  |  |  |  |  |  |  |  |  |  |
| *Hoplerythrinus unIRWeniatus* Spix & Agassiz, 1829 | 0 | 0 | 0 | 0 | 0 | 0 | 0 | 1 | 0 | 1 | 0 | 1 | 1 | 0 | 1 |
| *Hoplias curupira* Oyakawa & Mattox, 2009 | 4 | 1 | 0 | 0 | 5 | 1 | 0 | 1 | 3 | 5 | 6 | 4 | 6 | 4 | 10 |
| *Hoplias malabaricus* Bloch, 1974 | 2 | 0 | 0 | 7 | 9 | 3 | 1 | 6 | 0 | 10 | 6 | 13 | 11 | 8 | 19 |
| **Prochilodontidae** |  |  |  |  |  |  |  |  |  |  |  |  |  |  |  |
| *Prochilodus nigricans* Spix & Agassiz, 1829 | 5 | 0 | 0 | 0 | 5 | 18 | 13 | 28 | 3 | 62 | 36 | 31 | 51 | 16 | 67 |
| **Serrasalmidae** |  |  |  |  |  |  |  |  |  |  |  |  |  |  |  |
| *Myleus* sp*.* Müller & Troschel, 1844 | 3 | 0 | 0 | 0 | 3 | 9 | 0 | 3 | 0 | 12 | 12 | 3 | 15 | 0 | 15 |
| *Myloplus rubripinnis* Müller & Troschel, 1844 | 2 | 0 | 1 | 0 | 3 | 7 | 1 | 7 | 0 | 15 | 0 | 0 | 17 | 1 | 18 |
| *Pygocentrus nattereri* Kner,1858 | 5 | 0 | 0 | 0 | 5 | 2 | 21 | 0 | 0 | 23 | 28 | 0 | 7 | 21 | 28 |
| *Serrasalmus brandti* Lütken, 1875 | 0 | 0 | 0 | 0 | 0 | 0 | 0 | 1 | 0 | 1 | 0 | 1 | 1 | 0 | 1 |
| *Serrasalmus hollandi* Eigenmann, 1915 | 7 | 0 | 0 | 0 | 7 | 0 | 1 | 0 | 1 | 2 | 8 | 1 | 7 | 2 | 9 |
| *Serrasalmus manueli* Fernández-Yépez & Ramírez, 1967 | 5 | 0 | 0 | 1 | 6 | 0 | 0 | 0 | 0 | 0 | 5 | 1 | 5 | 1 | 6 |
| *Serrasalmus rhombeus* Linnaeus, 1766 | 3 | 4 | 0 | 1 | 8 | 0 | 0 | 1 | 0 | 1 | 7 | 2 | 4 | 5 | 9 |
| *Serrasalmus spilopleura* Kner,1858 | 5 | 1 | 1 | 17 | 24 |  | 3 | 3 | 1 | 7 | 9 | 22 | 9 | 22 | 31 |
| **Triportheidae** |  |  |  |  |  |  |  |  |  |  |  |  |  |  |  |
| *Triportheus albus* Cope, 1872 | 0 | 0 | 0 | 1 | 1 | 0 | 0 | 0 | 0 | 0 | 0 | 1 | 0 | 1 | 1 |
| *Triportheus trifurcatus* Castelnau, 1855 | 0 | 0 | 0 | 0 | 0 | 0 | 1 | 0 | 0 | 1 | 1 | 0 | 0 | 1 | 1 |
| CICHLIFORMES |  |  |  |  |  |  |  |  |  |  |  |  |  |  |  |
| **Cichlidae** |  |  |  |  |  |  |  |  |  |  |  |  |  |  |  |
| *Aequidens tetramerus* Heckel, 1840 | 0 | 0 | 0 | 0 | 0 | 0 | 0 | 1 | 0 | 1 | 5 | 1 | 1 | 5 | 1 |
| *Cichla ocellaris* Bloch & Schneider, 1801 | 0 | 0 | 0 | 0 | 0 | 1 | 0 | 0 | 0 | 1 | 1 | 0 | 1 | 0 | 1 |
| *Crenicichla lepidota* Heckel, 1840 | 2 | 0 | 1 | 0 | 3 | 0 | 2 | 3 | 0 | 5 | 4 | 4 | 6 | 2 | 8 |
| *Crenicichla ocutirostris* Günther, 1862 | 0 | 0 | 0 | 0 | 0 | 1 | 0 | 0 | 0 | 1 | 1 | 0 | 1 | 0 | 1 |
| *Crenicichla* sp*.* Heckel, 1840 | 0 | 3 | 0 | 0 | 3 | 0 | 0 | 0 | 1 | 3 | 3 | 1 | 0 | 4 | 6 |
| *Geophagus neambi* Lucena & Assis, 2010 | 1 | 7 | 1 | 0 | 9 | 2 | 0 | 0 | 10 | 12 | 10 | 11 | 4 | 17 | 21 |
| *Heros severus* Heckel, 1840 | 0 | 0 | 0 | 0 | 0 | 0 | 1 | 0 | 0 | 1 | 1 | 0 | 0 | 1 | 1 |
| *Retroculus lapidifer* Castelnau, 1855 | 0 | 2 | 0 | 0 | 2 | 2 | 0 | 0 | 16 | 18 | 4 | 16 | 2 | 18 | 20 |
| *Satanoperca jurupari* Heckel, 1840 | 0 | 0 | 0 | 0 | 0 | 0 | 1 | 90 | 10 | 100 | 1 | 100 | 90 | 11 | 101 |
| *Satanoperca* sp*.* Günther, 1862 | 0 | 0 | 0 | 0 | 0 | 0 | 0 | 0 | 23 | 23 | 0 | 23 | 0 | 23 | 23 |
| CLUPEIFORMES |  |  |  |  |  |  |  |  |  |  |  |  |  |  |  |
| **Pristigasteridae** |  |  |  |  |  |  |  |  |  |  |  |  |  |  |  |
| *Pellona castelnaeana* Valenciennes, 1847 | 5 | 0 | 0 | 0 | 5 | 0 | 0 | 0 | 0 | 0 | 5 | 0 | 5 | 0 | 5 |
| *Pellona flavipinnis* Valenciennes, 1837 | 0 | 1 | 0 | 0 | 1 | 0 | 0 | 0 | 0 | 0 | 1 | 0 | 0 | 1 | 1 |
| GYMNOTIFORMES |  |  |  |  |  |  |  |  |  |  |  |  |  |  |  |
| **Gymnotidae** |  |  |  |  |  |  |  |  |  |  |  |  |  |  |  |
| *Electrophorus electricus* Linnaeus, 1766 | 0 | 0 | 0 | 0 | 0 | 0 | 0 | 0 | 1 | 1 | 0 | 1 | 0 | 1 | 1 |
| **Sternopygidae** |  |  |  |  |  |  |  |  |  |  |  |  |  |  |  |
| *Eigenmannia* sp*.* Jordan & Evermann, 1896 | 1 | 28 | 3 | 26 | 58 | 0 | 0 | 0 | 11 | 11 | 29 | 40 | 4 | 65 | 69 |
| *Sternopygus macrurus* Bloch & Schneider, 1801 | 0 | 0 | 0 | 2 | 2 | 0 | 0 | 0 | 0 | 0 | 0 | 2 | 0 | 2 | 2 |
| OSTEOGLOSSIFORMES |  |  |  |  |  |  |  |  |  |  |  |  |  |  |  |
| **Osteoglossidae** |  |  |  |  |  |  |  |  |  |  |  |  |  |  |  |
| *Osteoglossum bicirrhosum* Cuvier, 1829 | 1 | 0 | 0 | 0 | 1 | 0 | 0 | 0 | 0 | 0 | 1 | 0 | 1 | 0 | 1 |
| PERCIFORMES |  |  |  |  |  |  |  |  |  |  |  |  |  |  |  |
| **Pomacentridae** |  |  |  |  |  |  |  |  |  |  |  |  |  |  |  |
| *Tometes* sp*.* Valenciennes, 1850 | 0 | 0 | 0 | 0 | 0 | 1 | 0 | 0 | 0 | 1 | 1 | 0 | 1 | 0 | 1 |
| **Scianidae** |  |  |  |  |  |  |  |  |  |  |  |  |  |  |  |
| *Plagioscion squamosissimus* Heckel, 1840 | 29 | 3 | 0 | 0 | 32 | 0 | 1 | 0 | 0 | 1 | 33 | 0 | 29 | 4 | 33 |
| SILURIFORMES |  |  |  |  |  |  |  |  |  |  |  |  |  |  |  |
| **Auchenipteridae** |  |  |  |  |  |  |  |  |  |  |  |  |  |  |  |
| *Ageneiosus apiaka* Ribeiro, RappPy-Daniel & Walsh, 2017 | 1 | 0 | 0 | 0 | 1 | 0 | 1 | 0 | 0 | 1 | 2 | 0 | 1 | 1 | 2 |
| *Ageneiosus inemis* Linnaeus, 1766 | 64 | 0 | 0 | 1 | 65 | 3 | 1 | 0 | 0 | 4 | 68 | 1 | 67 | 2 | 69 |
| *Auchenipterus nuchalis* Spix & Agassiz, 1829 | 0 | 0 | 0 | 0 | 0 | 1 | 0 | 0 | 0 | 1 | 1 | 0 | 0 | 0 | 1 |
| *Trachelyopterus galeatus* Linnaeus, 1766 | 0 | 0 | 0 | 1 | 1 | 0 | 0 | 0 | 0 | 0 | 0 | 1 | 1 | 0 | 1 |
| **Heptapteridae** |  |  |  |  |  |  |  |  |  |  |  |  |  |  |  |
| *Leptorhamdia* sp. Eigenmann, 1918 | 0 | 0 | 0 | 1 | 1 | 0 | 0 | 0 | 0 | 0 | 0 | 1 | 0 | 1 | 1 |
| **Loricariidae** |  |  |  |  |  |  |  |  |  |  |  |  |  |  |  |
| *Baryancistrus* sp. RappPy-Daniel, 1989 | 2 | 0 | 0 | 0 | 2 | 1 | 0 | 0 | 0 | 1 | 3 | 0 | 3 | 0 | 3 |
| *Farlowella smithi* Fowler, 1913 | 0 | 2 | 0 | 1 | 3 | 0 | 0 | 0 | 0 | 0 | 2 | 1 | 0 | 3 | 3 |
| *Hypostomus cochliodon* Kner,1854 | 0 | 0 | 0 | 1 | 1 | 0 | 0 | 0 | 0 | 0 | 0 | 1 | 0 | 1 | 1 |
| *Hypostomus paucipunctatus* Hollanda Carvalho & Weber, 2005 | 0 | 1 | 0 | 0 | 1 | 0 | 0 | 0 | 0 | 0 | 1 | 0 | 0 | 1 | 1 |
| *Hypostomus plecostomus* Linnaeus, 1758 | 1 | 0 | 4 | 0 | 5 | 10 | 0 | 1 | 1 | 12 | 11 | 6 | 16 | 1 | 17 |
| *Hypostomus punctatus* Valenciennes, 1840 | 0 | 0 | 0 | 1 | 1 | 0 | 0 | 0 | 8 | 8 | 0 | 9 | 0 | 9 | 9 |
| *Squaliforma emarginata* Valenciennes, 1840 | 0 | 0 | 1 | 0 | 1 | 1 | 0 | 0 | 0 | 1 | 1 | 1 | 2 | 0 | 2 |
| **Pimelodidae** |  |  |  |  |  |  |  |  |  |  |  |  |  |  |  |
| *Hemisorubim platyrhynchos* Valenciennes, 1840 | 3 | 0 | 0 | 0 | 3 | 2 | 0 | 0 | 1 | 3 | 5 | 1 | 5 | 1 | 6 |
| *Pimelodus* sp*.* Lacépède, 1803 | 0 | 0 | 0 | 0 | 0 | 0 | 1 | 0 | 0 | 1 | 1 | 0 | 0 | 1 | 1 |
| *Sorubim trigonocephalus* Miranda Ribeiro, 1920 | 0 | 2 | 0 | 0 | 2 | 0 | 1 | 0 | 0 | 1 | 3 | 0 | 0 | 3 | 3 |
| TETRAODONTIFORMES |  |  |  |  |  |  |  |  |  |  |  |  |  |  |  |
| **Tetraodontidae** |  |  |  |  |  |  |  |  |  |  |  |  |  |  |  |
| *Colomesus tocantinensis* Amaral, Brito, Silva & Carvalho, 2013 | 0 | 0 | 0 | 0 | 0 | 0 | 1 | 0 | 0 | 1 | 1 | 0 | 0 | 1 | 1 |
| [**CHONDRICHTHYES**](https://www.google.com/search?sca_esv=b848d1a43a479422&rlz=1C1VDKB_enBR1136BR1136&q=Chondrichthyes&stick=H4sIAAAAAAAAAONgVuLQz9U3MMwpq1jEyueckZ-XUpSZnFGSUZlaDABkLar7HQAAAA&sa=X&sqi=2&ved=2ahUKEwi70aSY0_OLAxUYFLkGHVh4AEYQmxMoAHoECA4QAg) |  |  |  |  |  |  |  |  |  |  |  |  |  |  |  |
| MYLIOBATIFORMES |  |  |  |  |  |  |  |  |  |  |  |  |  |  |  |
| **Potamotrygonidae** |  |  |  |  |  |  |  |  |  |  |  |  |  |  |  |
| *Potamotrygon orbignyi* Castelnau, 1855 | 0 | 0 | 0 | 0 | 0 | 0 | 0 | 0 | 1 | 1 | 0 | 1 | 1 | 0 | 1 |
| **TOTAL** |  |  |  |  | | | | | | | | | |  | **766** |

Supplementary Table S3. Final GAMLSS model of the total abundance of the fish assemblage as a function of the season, area, basin, and the interactions of these factors in the Carajás Mineral Province, northern Brazil. Legend: AIC = Akaike Information Criterion; R² = Coefficient of Determination. Values in bold script indicate significance differences (p < 0.05).

| Univariate model: Abundance ~ 1, sigma.formula= ~ Season; Family: Binomial Negative type I; AIC= 317.361; R²= 25.64%. | | | | |
| --- | --- | --- | --- | --- |
| Mu coefficient | Estimate | Standard Error | *t* | *p* |
| Intercept | 2.6203 | 0.2144 | 12.22 | **3.38e-16** |
| Sigma coefficient | Estimate | Standard Error | *t* | *p* |
| Intercept | 0.2073 | 0.2605 | 0.796 | 0.4301 |
| Rainy season | 1.7508 | 0.4538 | 3.858 | **0.0003** |

Supplementary Table S4. Results of the PERMANOVA applied to the fish beta diversity, which evaluates the effects of season, area, basin, and their interactions (season:basin; area:basin) in the Carajás Mineral Province in May and November 2022. R² = Coefficient of Determination; F = Fisher’s test; p = probability. Significant results (p < 0.05) are shown in bold script.

| Univariate model:Beta diversity ~ Season + Area + Basin + Season:Basin + Area:Basin; Permutations = 9.999; P adjusted method = Bonferroni. | | | | |
| --- | --- | --- | --- | --- |
| Variable | Degrees of Freedom | R² (%) | F | p |
| Season | 1 | 2.75 | 0.8905 | 0.5700 |
| Area | 1 | 3.69 | 1.1939 | 0.2680 |
| Basin | 1 | 6.69 | 2.1639 | **0.0112** |
| Season:Basin | 1 | 1.46 | 0.4731 | 0.9535 |
| Area:Basin | 1 | 4.89 | 1.5815 | 0.0744 |
| Residuals | 26 | 80.48 |  |  |

Supplementary Table S5 – Species Contributions to Beta Diversity (SCBD) of the fish assemblage of the Carajás Mineral Province in May and November 2022. Values in bold script indicate a significant difference in the SCBD, and * indicates the highest value in the comparison.

| Species | Season | | Area | | Basin | |
| --- | --- | --- | --- | --- | --- | --- |
| Rainy | Dry | Control | Impacted | IRB | PRB |
| *Aequidens tetramerus* | 0.0176 | 0.0009 | 0.0184 | 0.0009 | 0.0245 | 0.0006 |
| *Ageneiosus apiaka* | 0.0051 | 0.0005 | 0.0056 | 0.0000 | 0.0004 | 0.0059 |
| *Ageneiosus inermis* | 0.0128 | 0.0408 | 0.0280 | 0.0172 | 0.0458 | 0.0054 |
| *Anostomus ternetzi* | 0.0140 | 0.0000 | 0.0147 | 0.0000 | 0.0000 | 0.0162 |
| *Auchenipterus nuchalis* | 0.0000 | 0.0013 | 0.0015 | 0.0000 | 0.0000 | 0.0009 |
| *Baryancistrus sp.* | 0.0000 | 0.0024 | 0.0015 | 0.0000 | 0.0009 | 0.0009 |
| *Boulengerella cuvieri* | 0.0112 | 0.0059 | 0.0133 | 0.0058 | 0.0000 | 0.0172 |
| *Cichla ocellaris* | 0.0000 | 0.0013 | 0.0008 | 0.0000 | 0.0000 | 0.0009 |
| *Colomesus tocantinensis* | 0.0024 | 0.0000 | 0.0025 | 0.0000 | 0.0000 | 0.0028 |
| *Crenicichla lepidota* | 0.0281 | 0.0210 | 0.0317 | 0.0164 | 0.0163 | 0.0338 |
| *Crenicichla ocutirostris* | 0.0000 | 0.0919 | 0.0591* | 0.0001 | 0.0000 | 0.0650 |
| *Crenicichla sp.* | 0.0106 | 0.0000 | 0.0104 | 0.0014 | 0.0138 | 0.0010 |
| *Cynopotamus juruenae* | 0.0000 | 0.0013 | 0.0008 | 0.0000 | 0.0000 | 0.0009 |
| *Eigenmannia sp.* | **0.1320*** | **0.0473** | **0.0559** | **0.1652*** | **0.1700*** | **0.0446** |
| *lectrophorus electricus* | 0.0035 | 0.0000 | 0.0000 | 0.0053 | 0.0000 | 0.0040 |
| *Farlowella smithi* | 0.0054 | 0.0000 | 0.0039 | 0.0028 | 0.0075 | 0.0000 |
| *Geophagus neambi* | 0.0454 | 0.0127 | 0.0316 | 0.0398 | 0.0462 | 0.0259 |
| *Hemisorubim platyrhynchos* | 0.0009 | 0.0056 | 0.0036 | 0.0014 | 0.0027 | 0.0028 |
| *Heros severus* | 0.0051 | 0.0000 | 0.0053 | 0.0000 | 0.0000 | 0.0059 |
| *Hoplerythrinus unIRBeniatus* | 0.0000 | 0.0017 | 0.0000 | 0.0016 | 0.0000 | 0.0012 |
| *Hoplias curupira* | 0.0133 | 0.0535 | 0.0101 | 0.0565 | 0.0127 | 0.0431 |
| *Hoplias malabaricus* | 0.0390 | 0.0721 | 0.0458 | 0.0601 | 0.0520 | 0.0530 |
| *Hydrolycus tatauaia* | 0.0000 | 0.0326 | 0.0211 | 0.0000 | 0.0279 | 0.0000 |
| *Hypostomus cochliodon* | 0.0070 | 0.0000 | 0.0000 | 0.0107 | 0.0098 | 0.0000 |
| *Hypostomus paucipunctatus* | 0.0033 | 0.0000 | 0.0034 | 0.0000 | 0.0046 | 0.0000 |
| *Hypostomus plecostomus* | 0.0035 | 0.0527 | 0.0089 | 0.0427 | 0.0350 | 0.0138 |
| *Hypostomus punctatus* | 0.0090 | 0.0000 | 0.0000 | 0.0137 | 0.0026 | 0.0086 |
| *Leporinus friderici* | **0.0809** | **0.1597*** | 0.1207 | 0.0980 | **0.1365*** | **0.0832** |
| *Leporinus vittatus* | 0.0000 | 0.0005 | 0.0003 | 0.0000 | 0.0004 | 0.0000 |
| *Leptorhamdia sp.* | 0.0070 | 0.0000 | 0.0000 | 0.0107 | 0.0098 | 0.0000 |
| *Moenkhausia cf. sanctaefilomenae* | 0.0070 | 0.0000 | 0.0000 | 0.0107 | 0.0098 | 0.0000 |
| *Myleus sp.* | 0.0000 | 0.0177 | 0.0087 | 0.0048 | 0.0014 | 0.0117 |
| *Myloplus rubripinnis* | 0.0046 | 0.0293 | 0.0110 | 0.0198 | 0.0094 | 0.0189 |
| *Osteoglossum bicirrhosum* | 0.0000 | 0.0005 | 0.0003 | 0.0000 | 0.0004 | 0.0000 |
| *Pellona castelnaeana* | 0.0000 | 0.0043 | 0.0028 | 0.0000 | 0.0037 | 0.0000 |
| *Pellona flavipinnis* | 0.0046 | 0.0000 | 0.0049 | 0.0000 | 0.0075 | 0.0000 |
| *Pimelodus sp.* | 0.0563 | 0.0000 | 0.0591 | 0.0000 | 0.0000 | 0.0650* |
| *Plagioscion squamosissimus* | 0.0160 | 0.0209 | 0.0282 | 0.0000 | 0.0352 | 0.0028 |
| *Potamotrygon orbignyi* | 0.0000 | 0.0017 | 0.0000 | 0.0016 | 0.0000 | 0.0012 |
| *Prochilodus nigricans* | 0.0450 | 0.1504* | 0.1068 | 0.0483 | 0.0065 | 0.0000 |
| *Pygocentrus nattereri* | 0.1198 | 0.0053 | 0.1265* | 0.0000 | 0.0024 | 0.1360* |
| *Raphiodon vulpinus* | 0.0234 | 0.0000 | 0.0246 | 0.0000 | 0.0327 | 0.0000 |
| *Retroculus lapidifer* | 0.0367 | 0.0027 | 0.0084 | 0.0483 | 0.0092 | 0.0376 |
| *Salminus hilarii* | 0.0263 | 0.0159 | 0.0356 | 0.0000 | 0.0405 | 0.0079 |
| *Satanoperca jurupari* | 0.0228 | 0.0870* | 0.0053 | 0.1034* | 0.0000 | 0.0818* |
| *Satanoperca sp.* | 0.0215 | 0.0000 | 0.0000 | 0.0329 | 0.0000 | 0.0249 |
| *Schizodon vittatus* | 0.0066 | 0.0034 | 0.0088 | 0.0000 | 0.0117 | 0.0000 |
| *Serrasalmus brandtii* | 0.0000 | 0.0017 | 0.0000 | 0.0016 | 0.0000 | 0.0012 |
| *Serrasalmus hollandi* | 0.0032 | 0.0040 | 0.0049 | 0.0014 | 0.0034 | 0.0037 |
| *Serrasalmus manueli* | 0.0031 | 0.0093 | 0.0060 | 0.0047 | 0.0117 | 0.0000 |
| *Serrasalmus rhombeus* | 0.0194 | 0.0047 | 0.0154 | 0.0119 | 0.0283 | 0.0012 |
| *Serrasalmus spilopleura* | 0.0678 | 0.0210 | 0.0205 | 0.0944 | 0.0939* | 0.0155 |
| *Sorubim trigonocephalus* | 0.0139 | 0.0000 | 0.0146 | 0.0000 | 0.0130 | 0.0059 |
| *Squaliforma emarginata* | 0.0000 | 0.0112 | 0.0008 | 0.0095 | 0.0087 | 0.0009 |
| *Sternopygus macrurus* | 0.0134 | 0.0000 | 0.0000 | 0.0204 | 0.0187 | 0.0000 |
| *Tometes sp.* | 0.0000 | 0.0013 | 0.0008 | 0.0000 | 0.0000 | 0.0009 |
| *Trachelyopterus galeatus* | 0.0112 | 0.0000 | 0.0000 | 0.0172 | 0.0157 | 0.0000 |
| *Triportheus albus* | 0.0112 | 0.0000 | 0.0000 | 0.0172 | 0.0157 | 0.0000 |
| *Triportheus trifurcatus* | 0.0051 | 0.0000 | 0.0053 | 0.0000 | 0.0000 | 0.0059 |

Supplementary S6. Biological Collection License from SISBIO (Biodiversity Authorization and Information System)


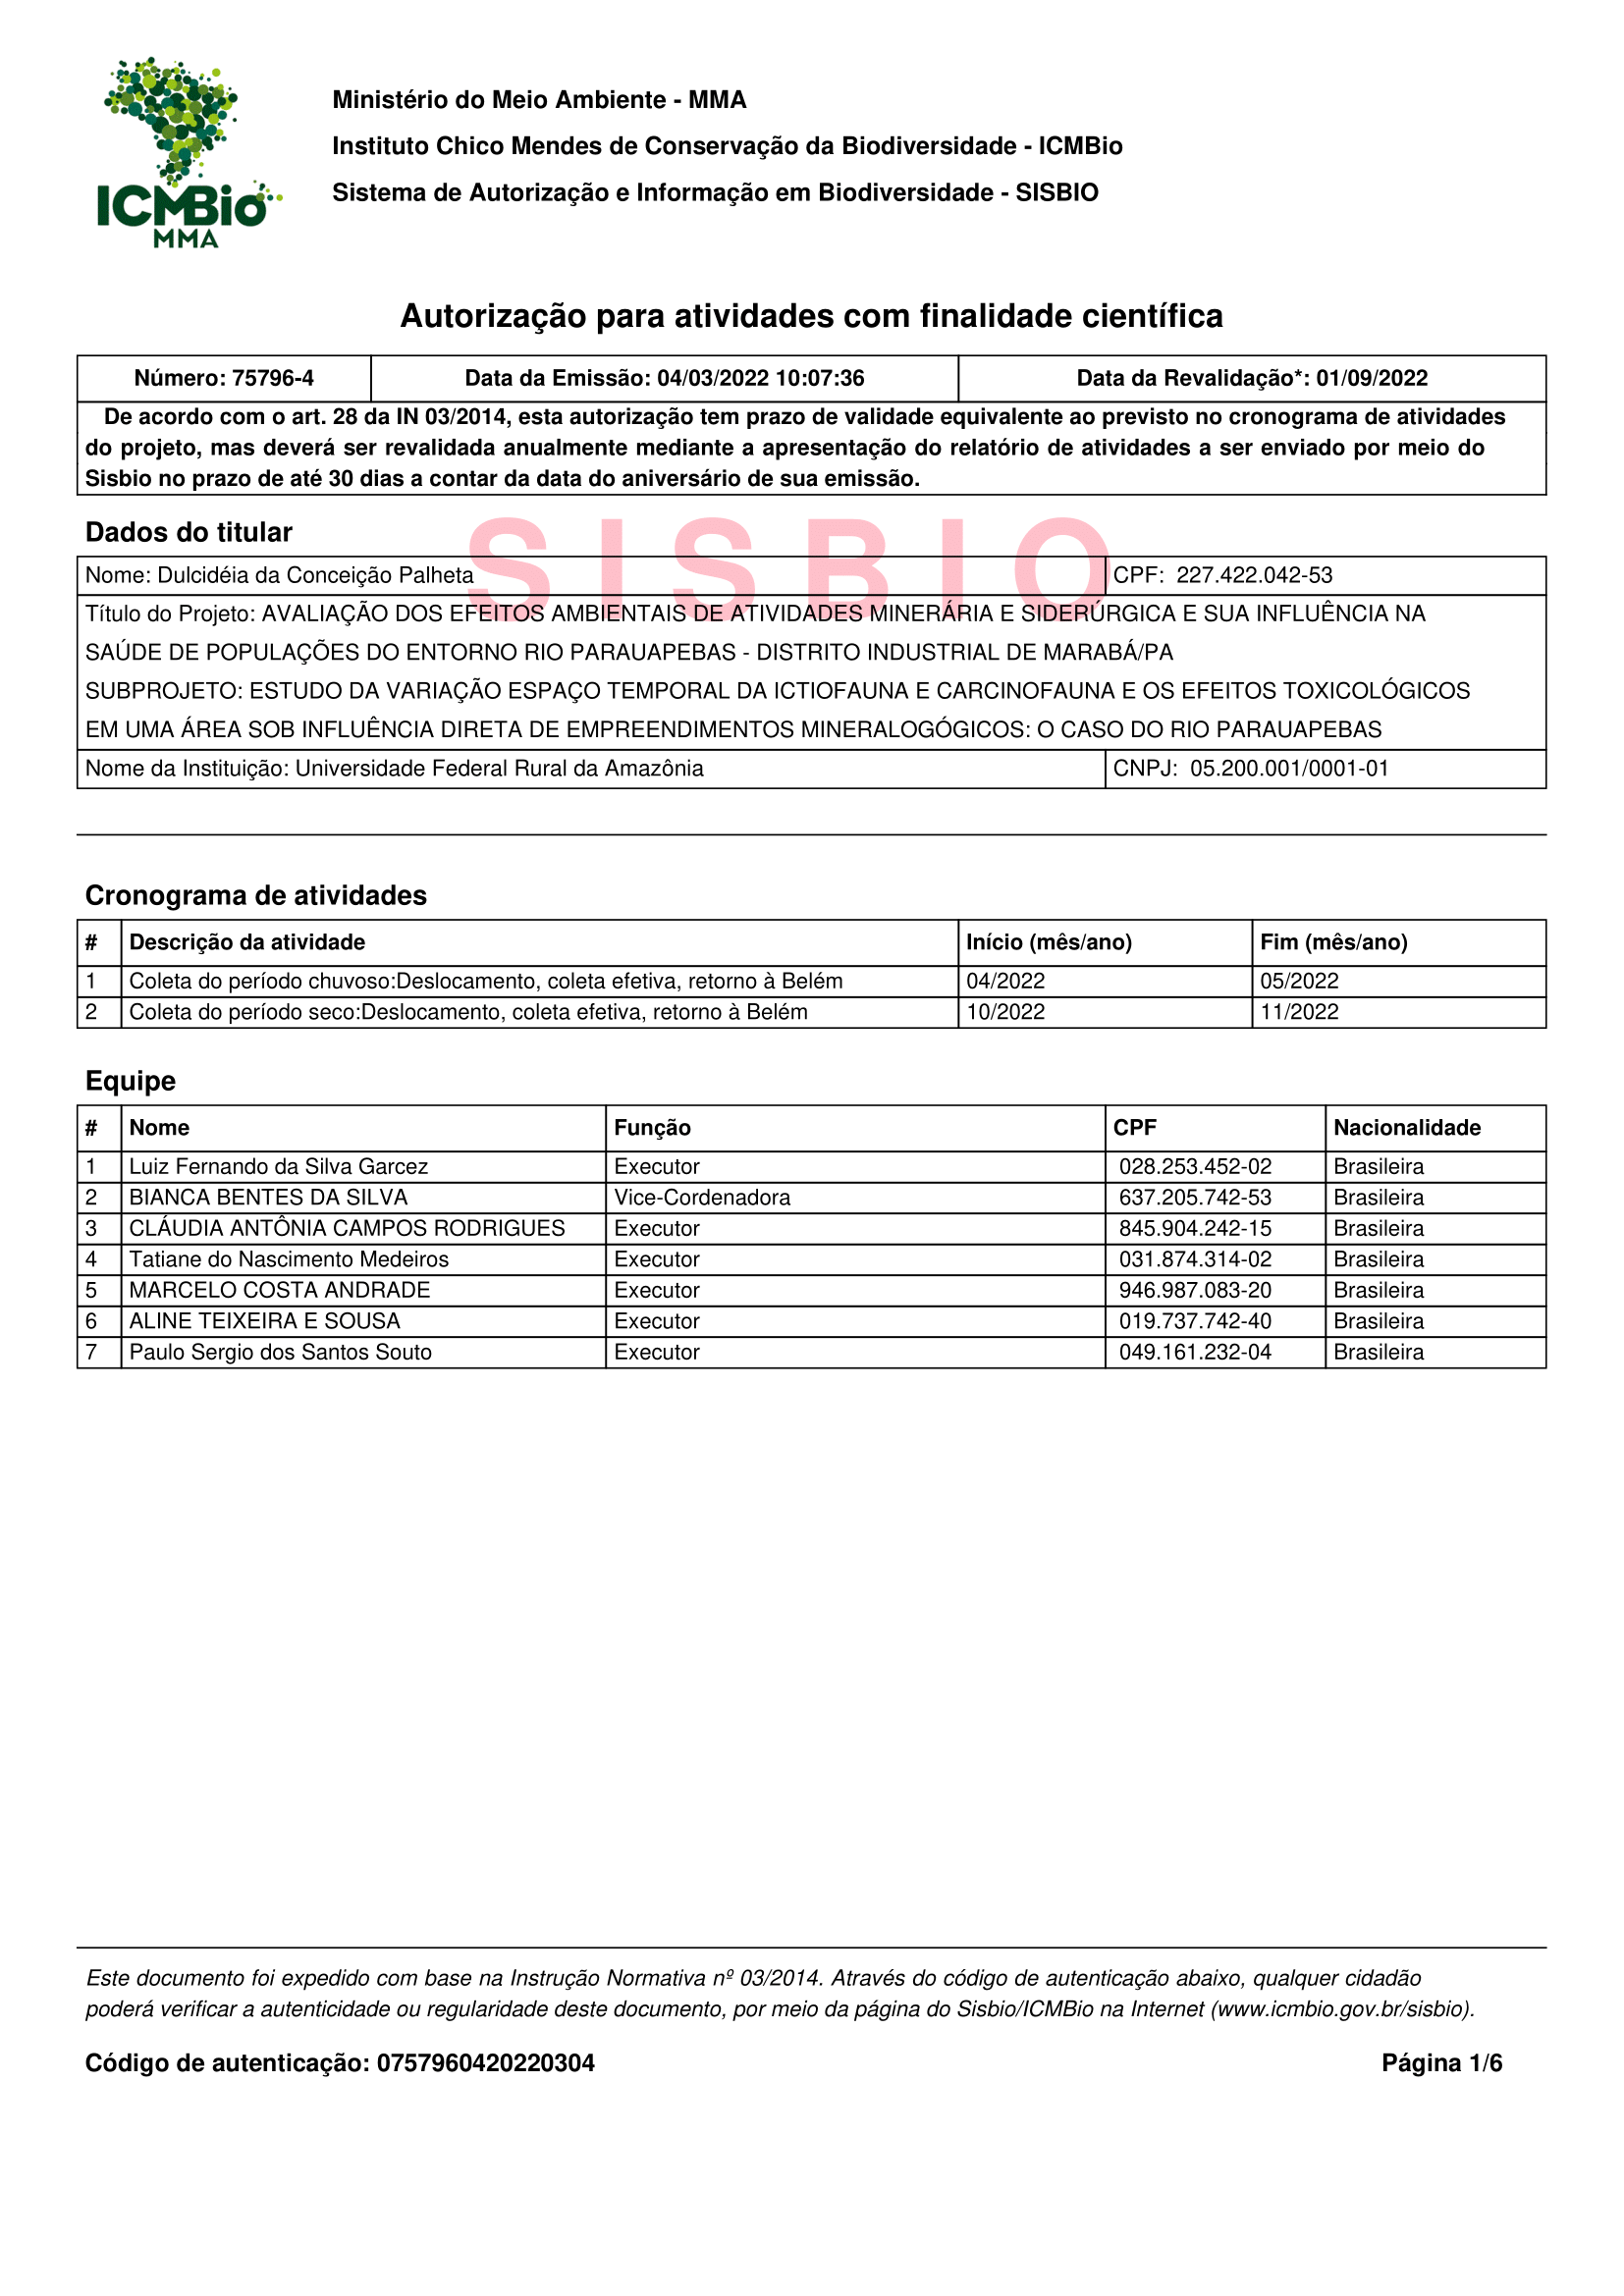


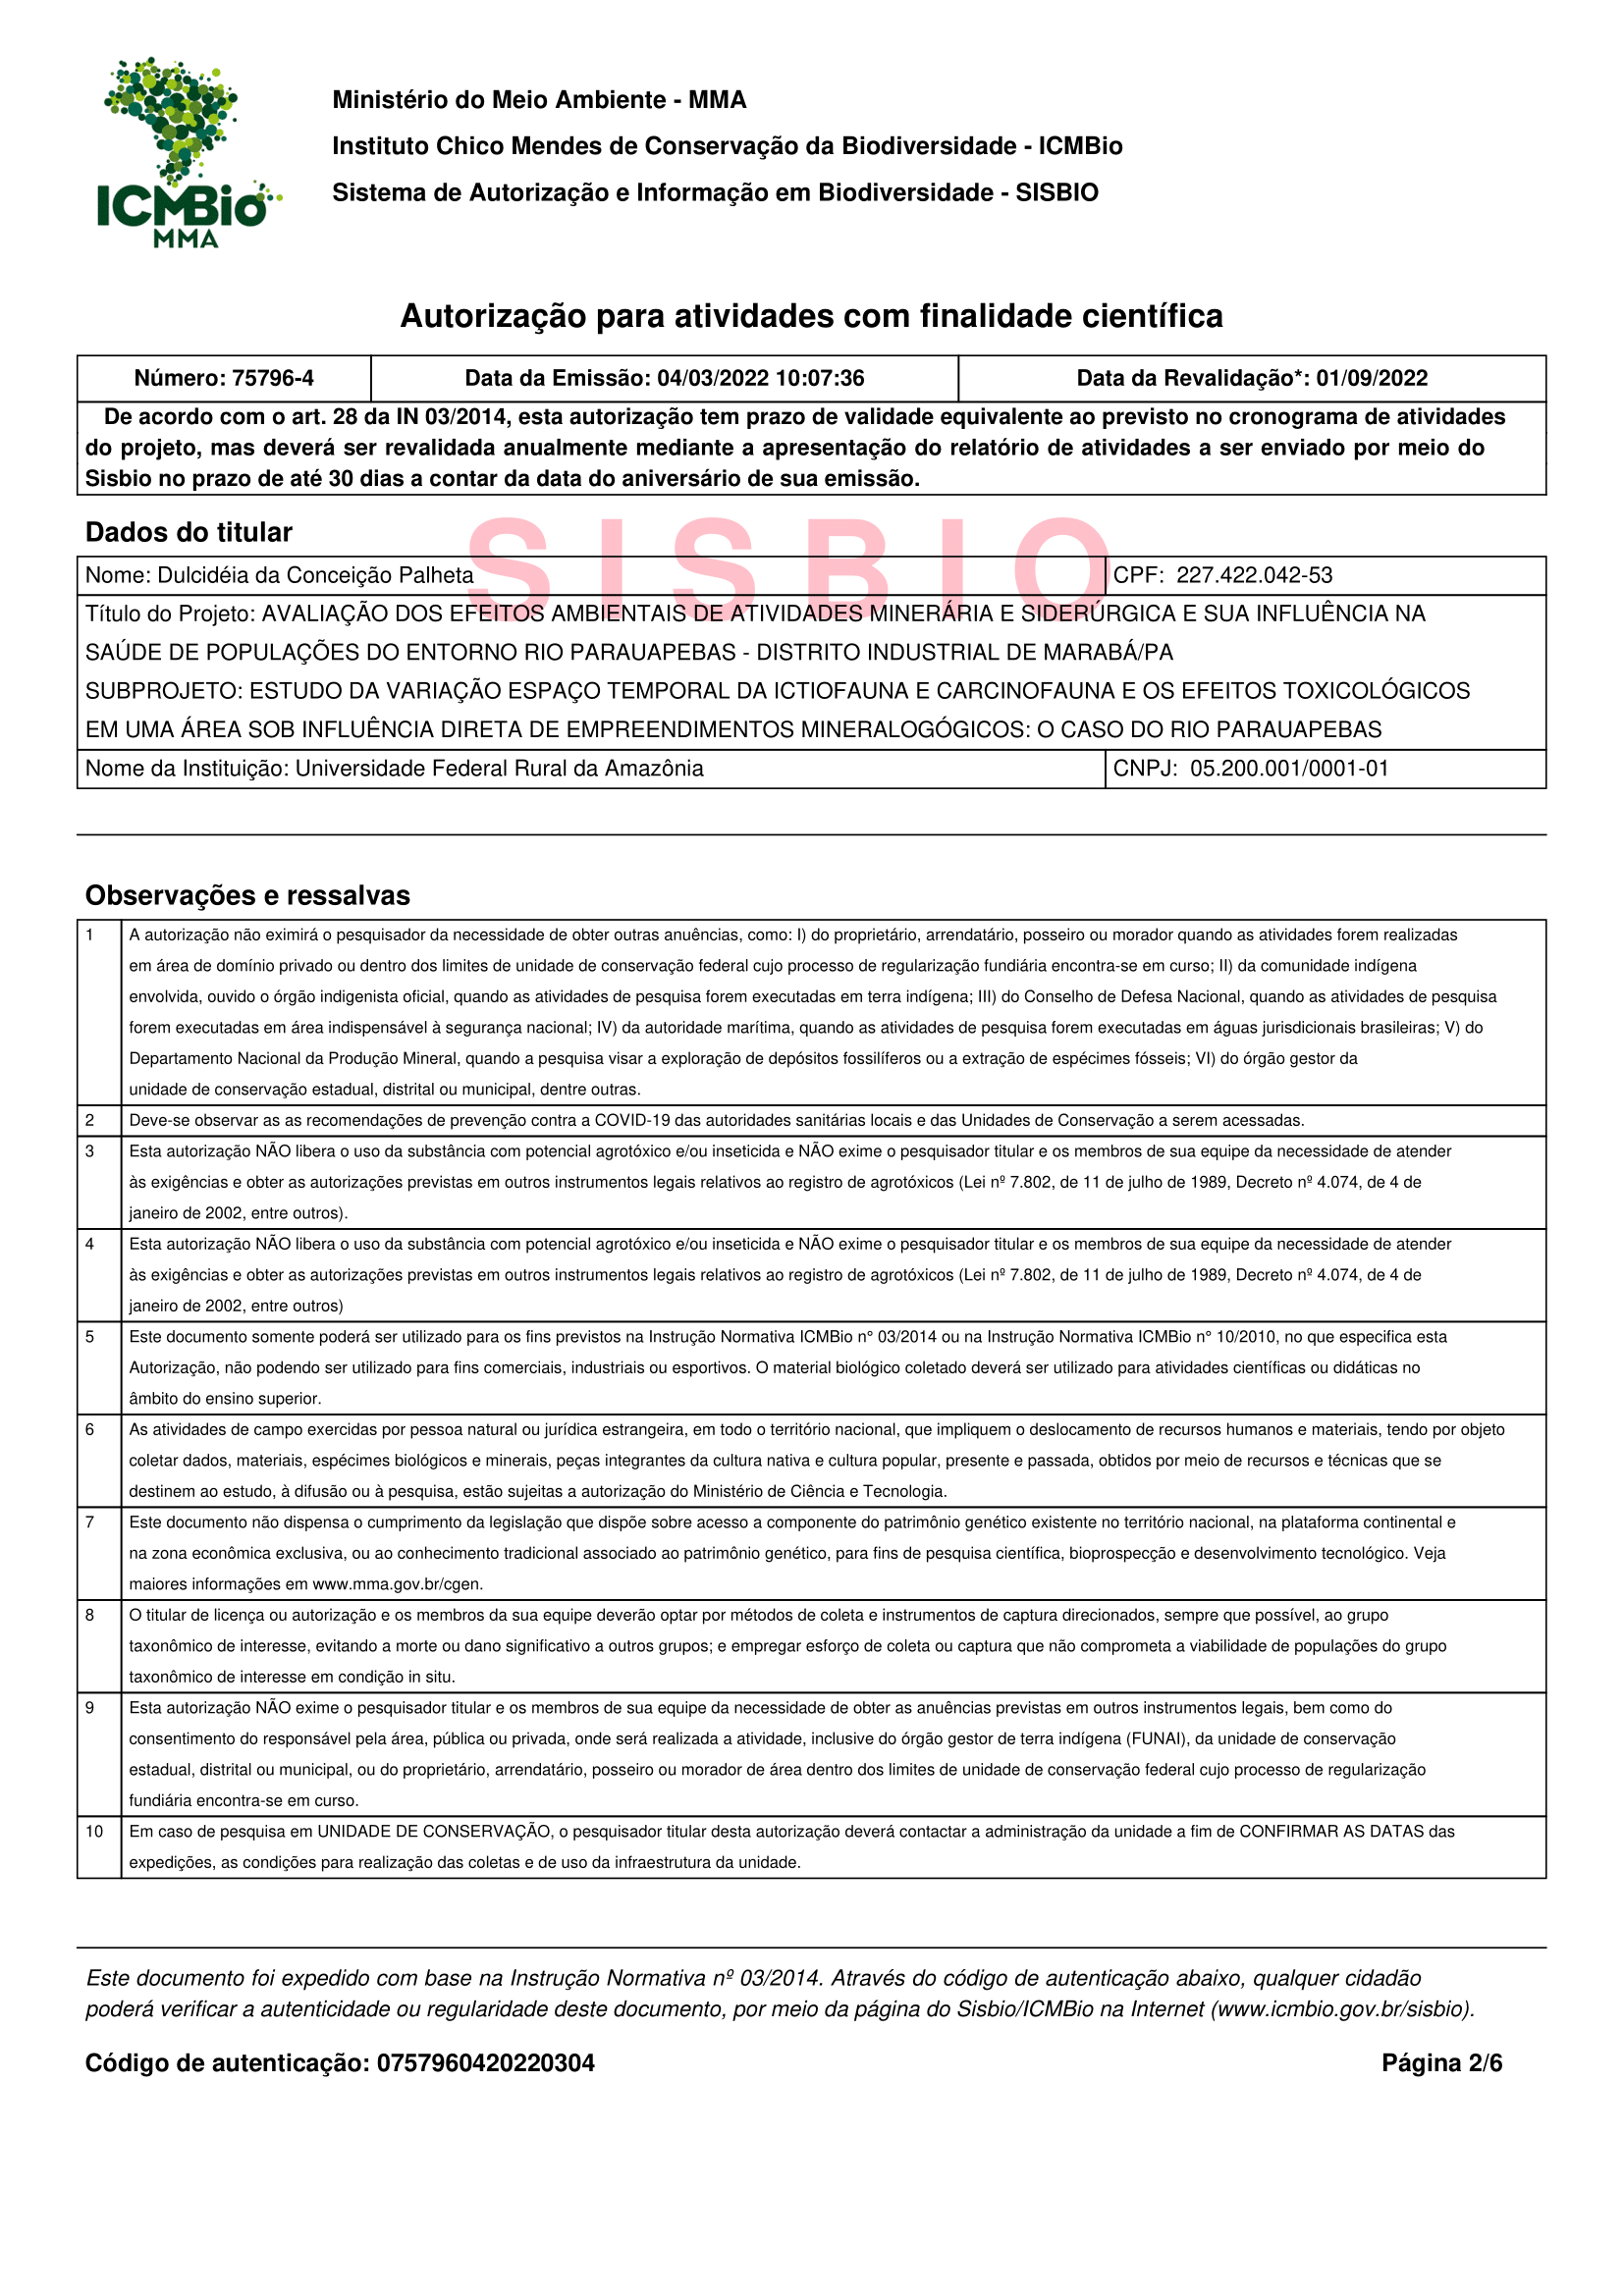


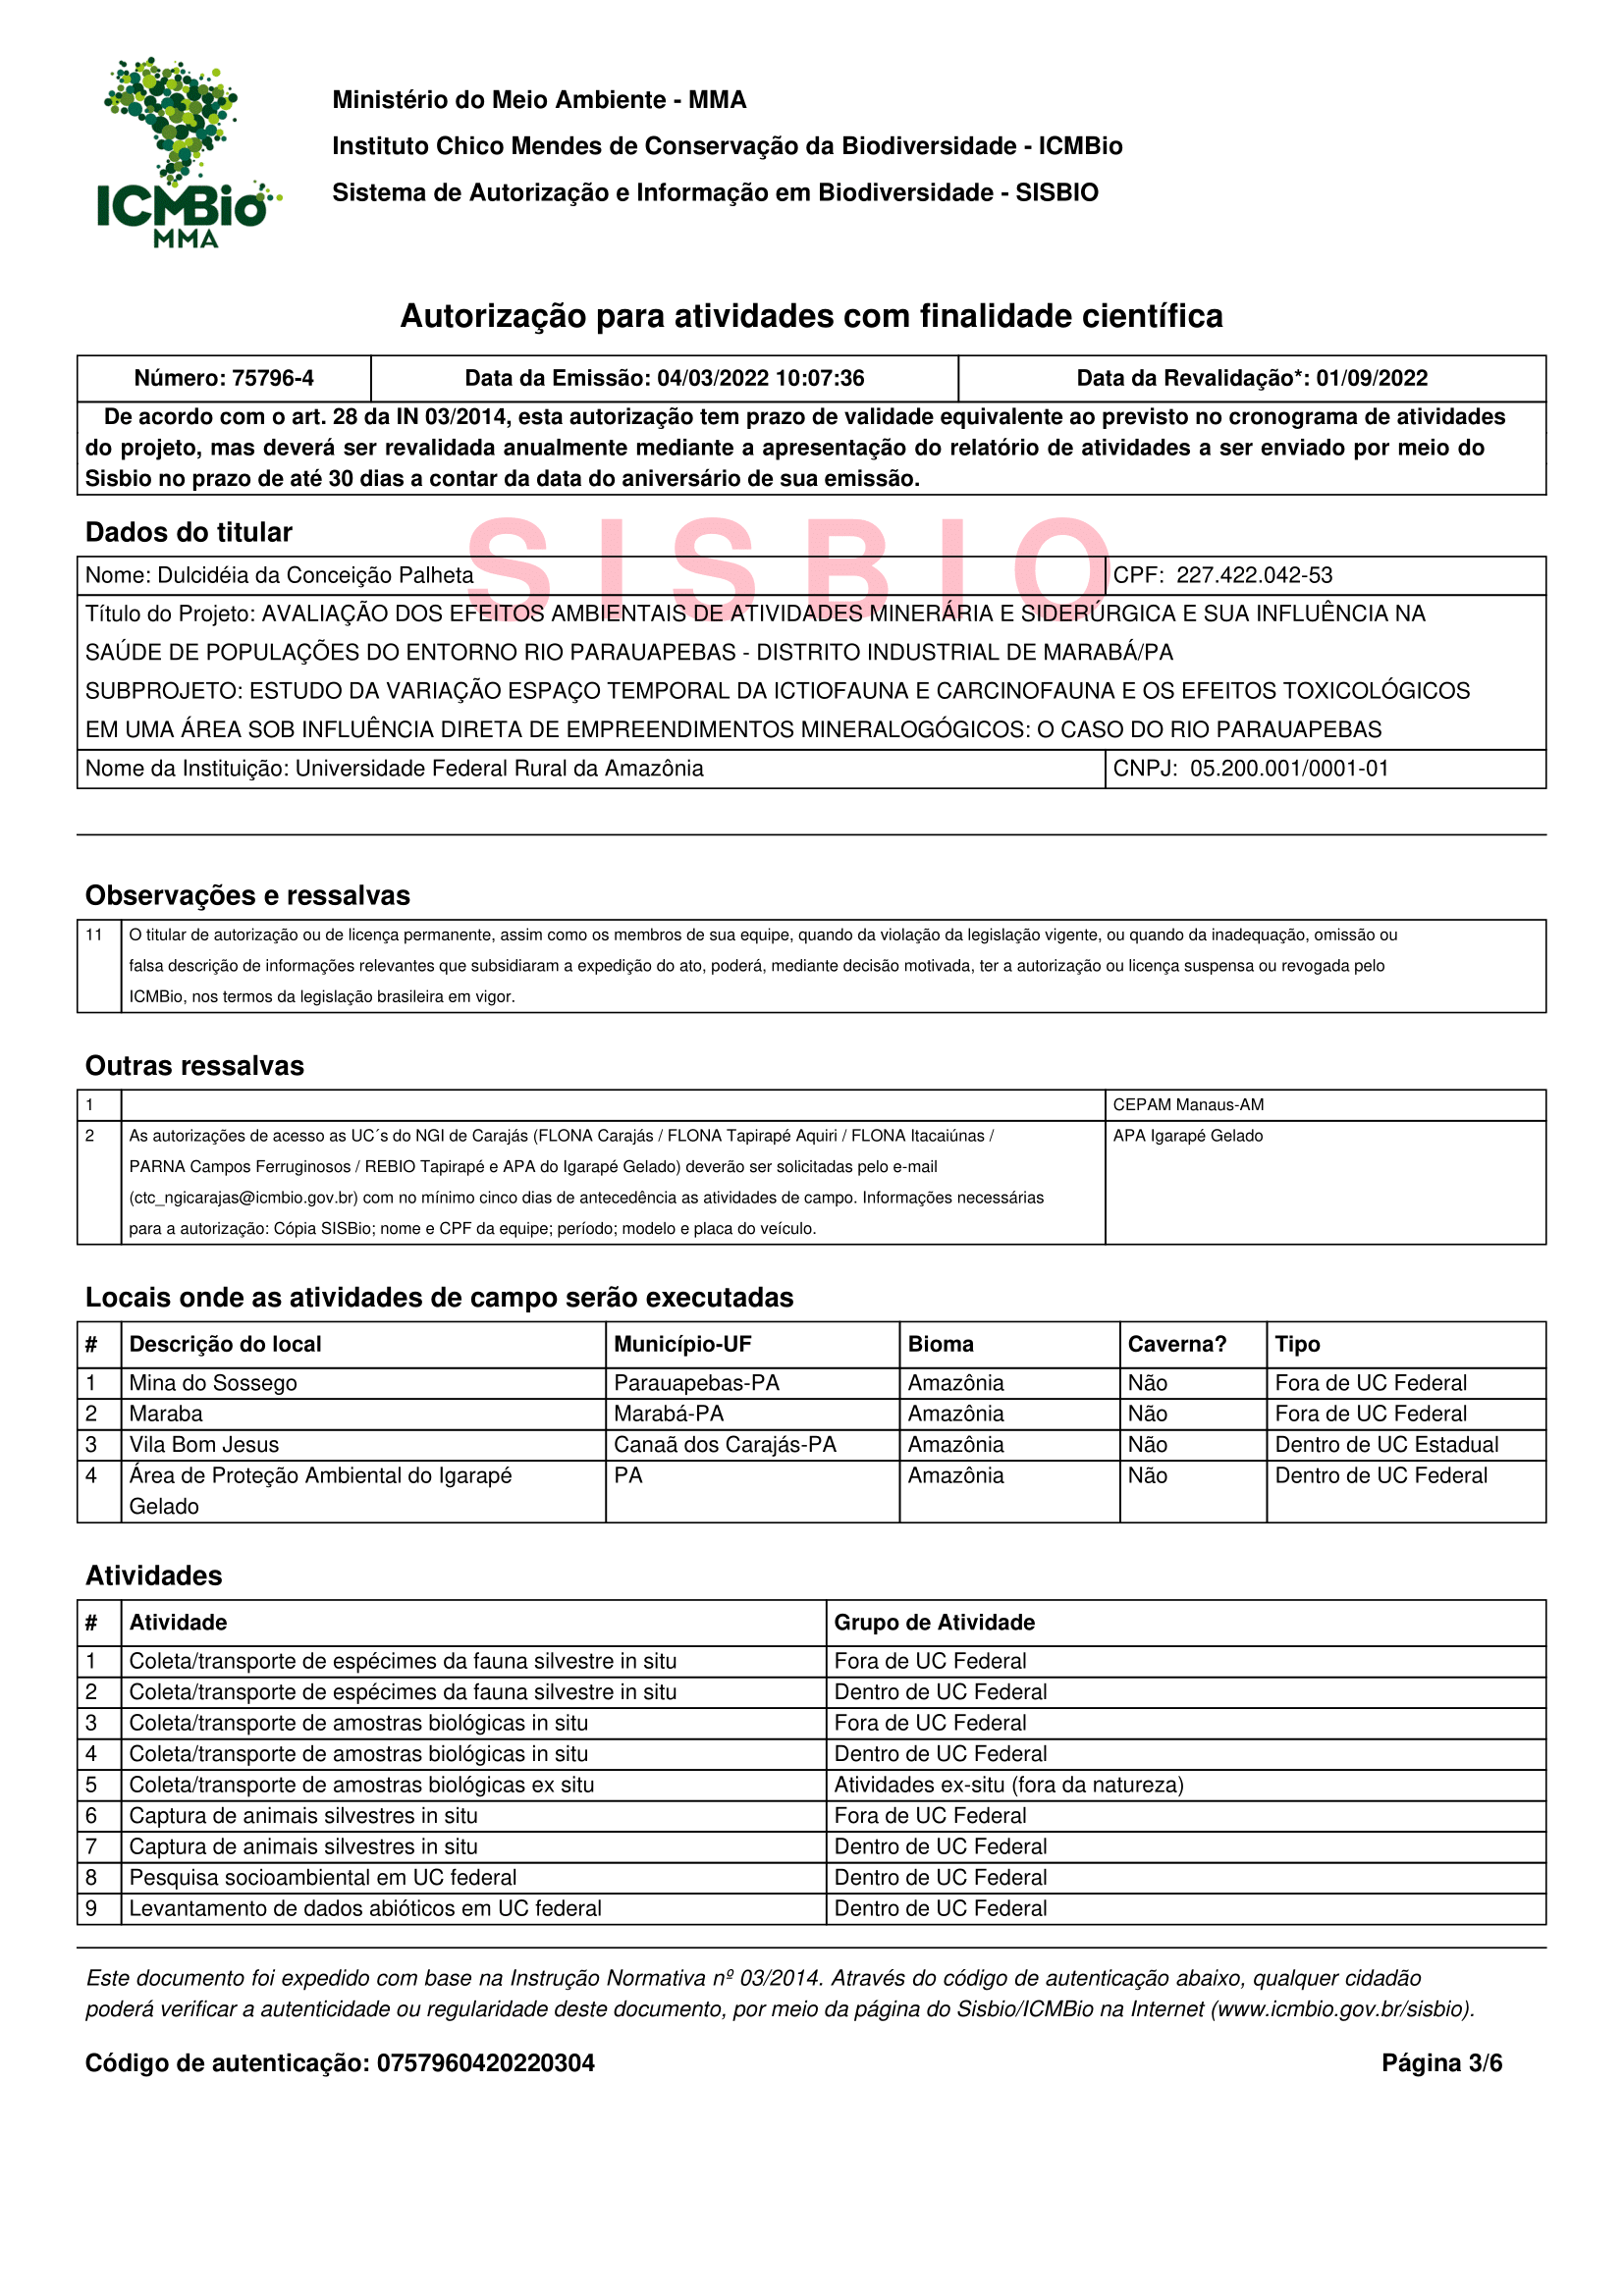


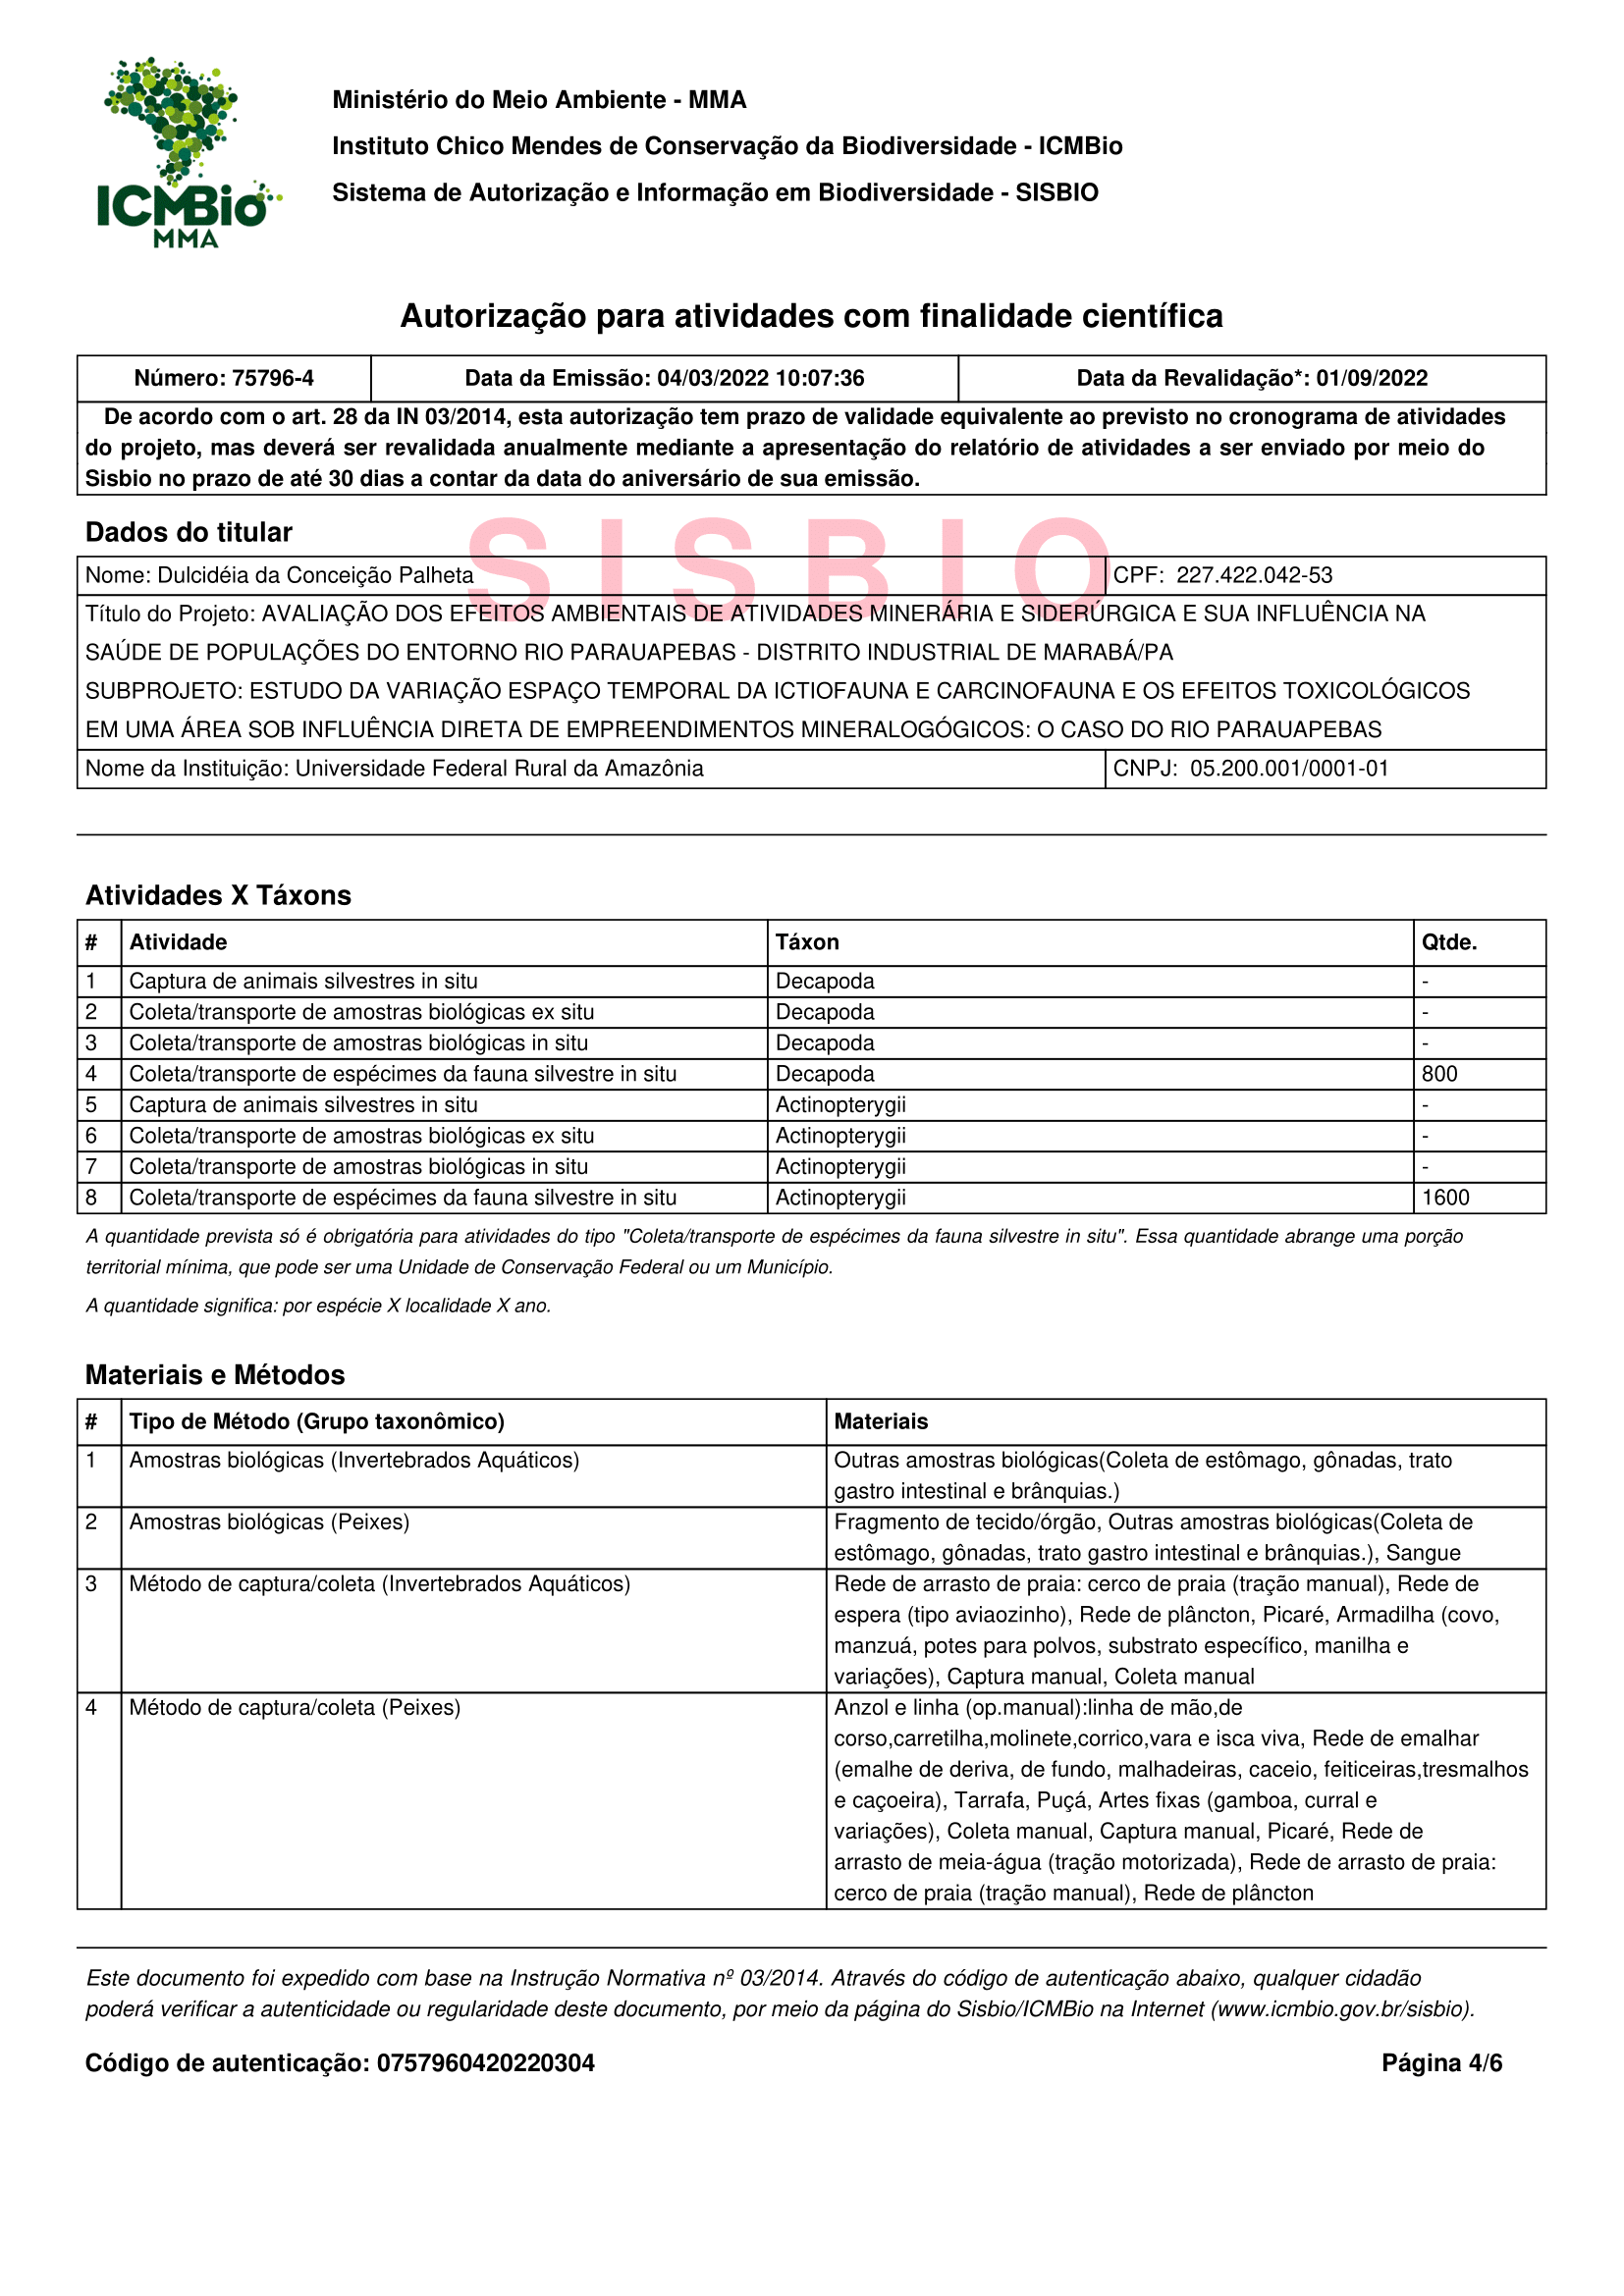

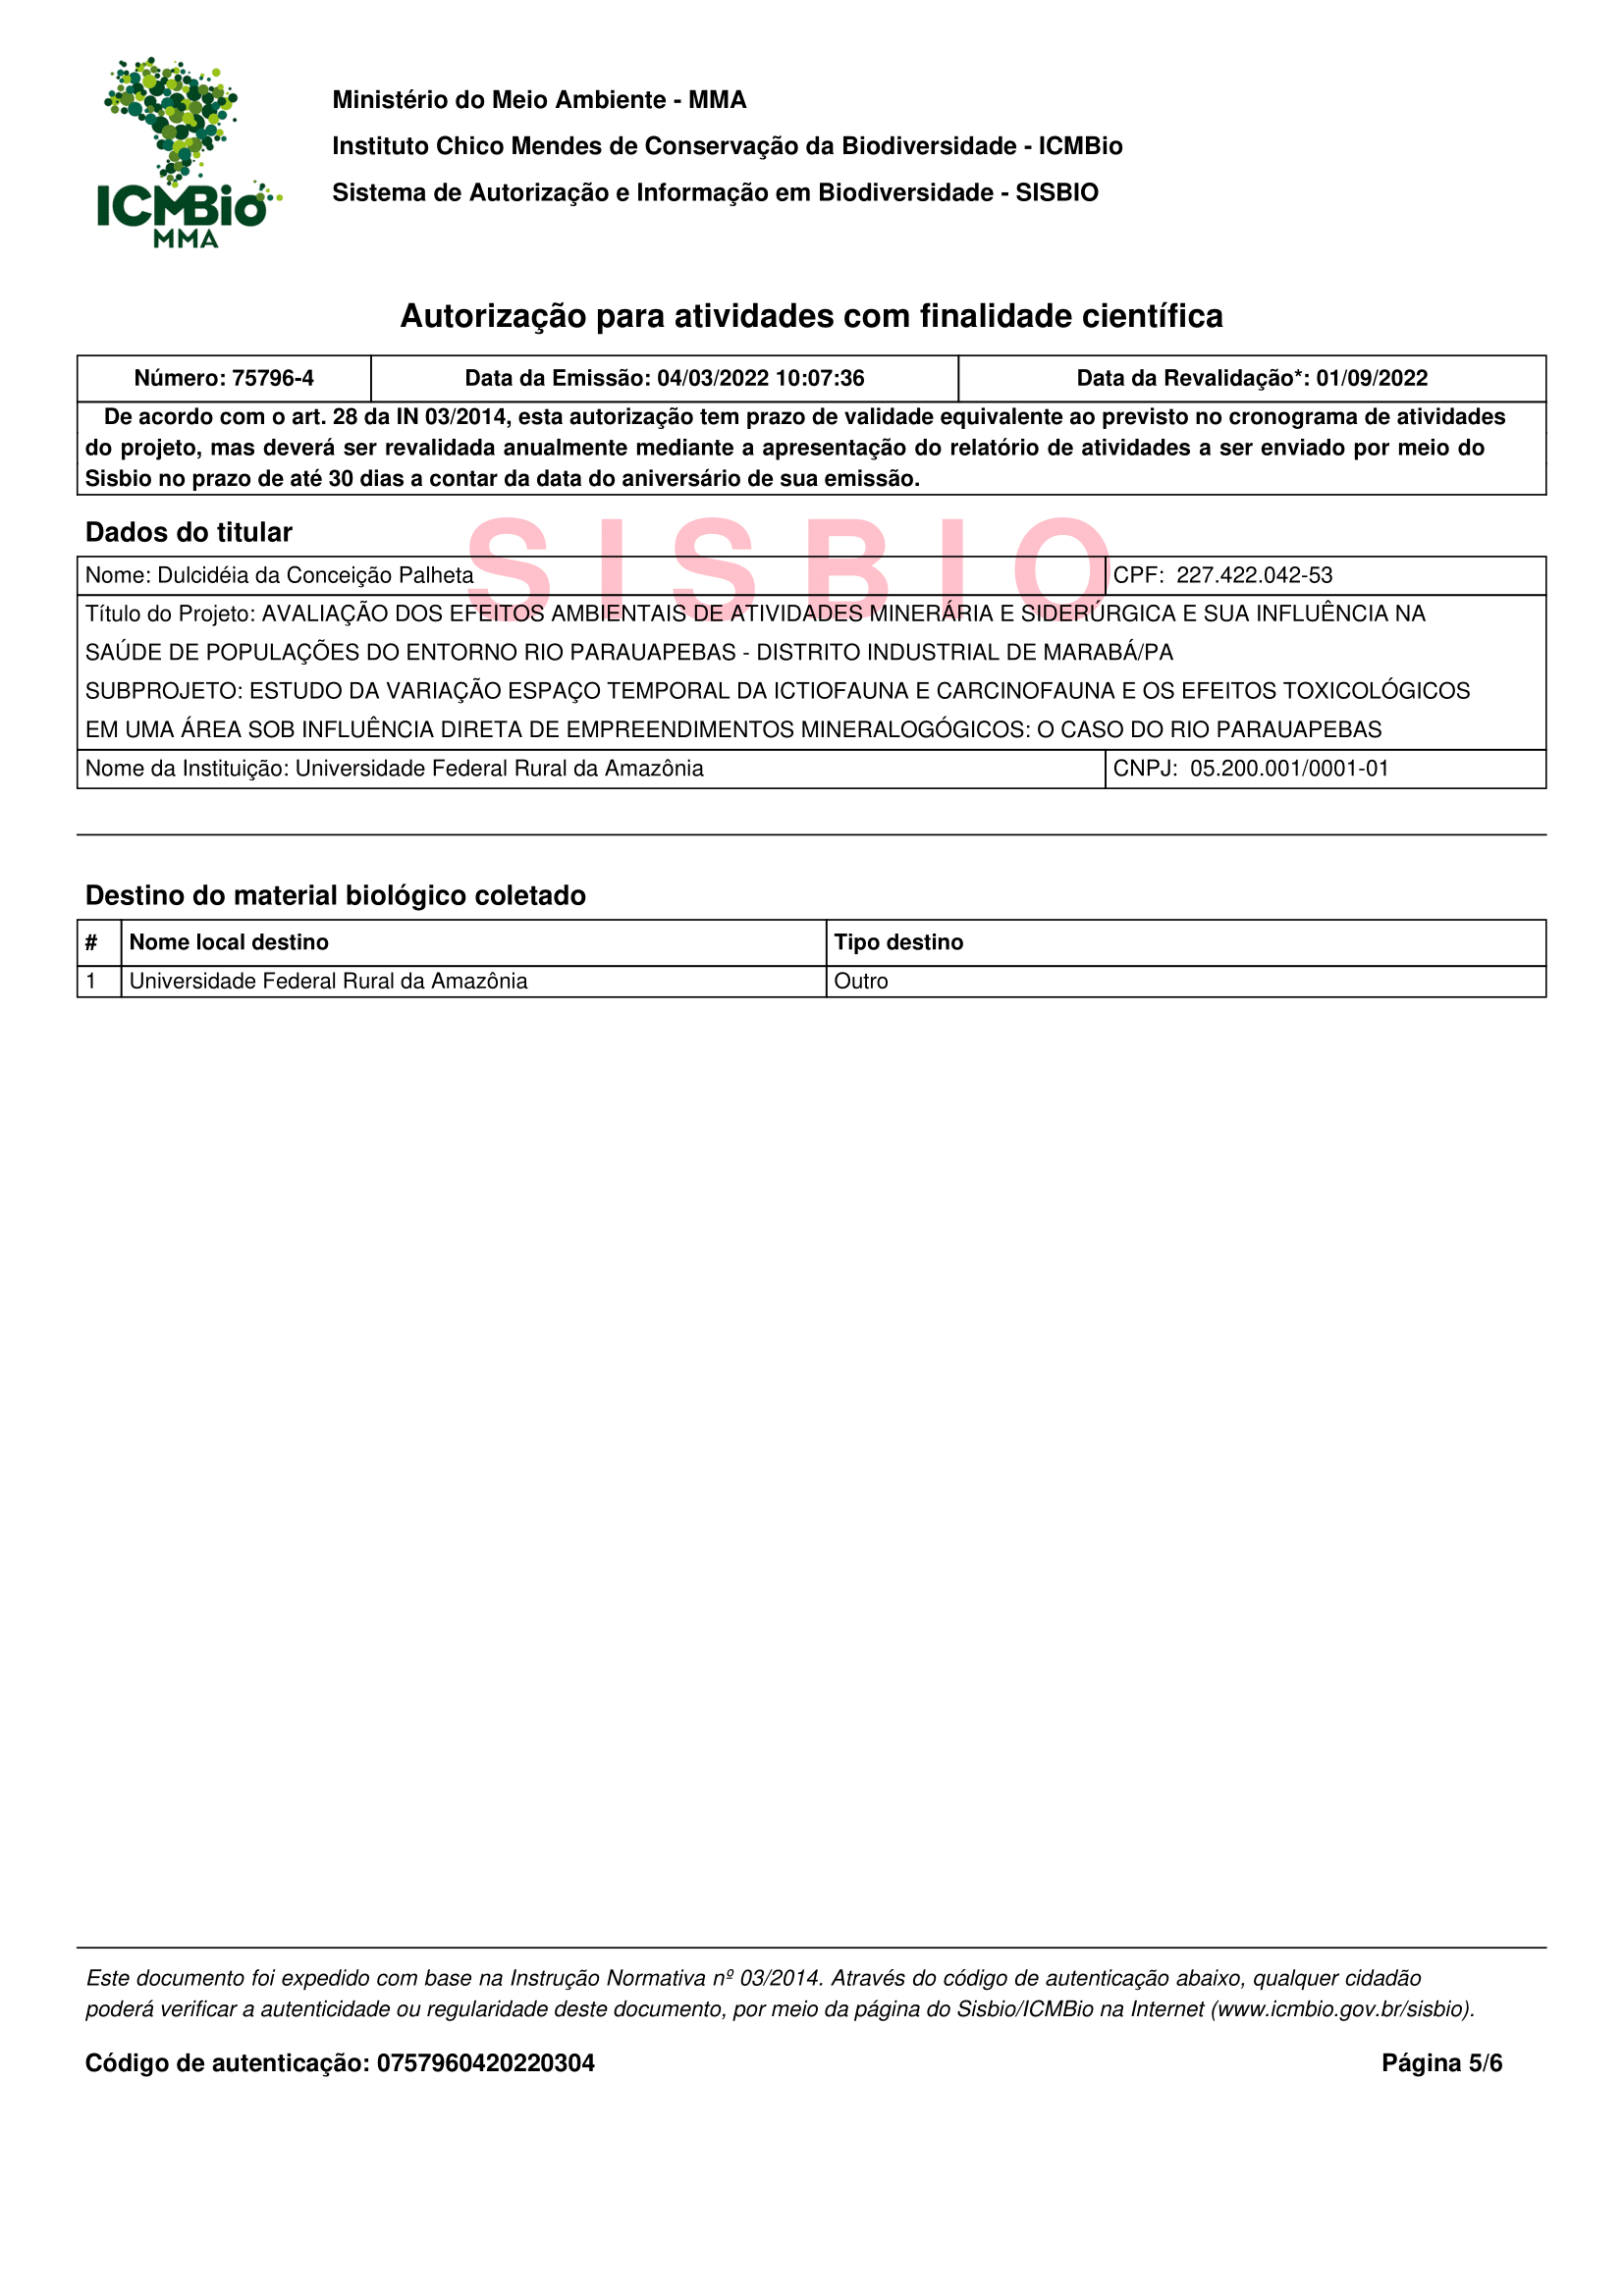

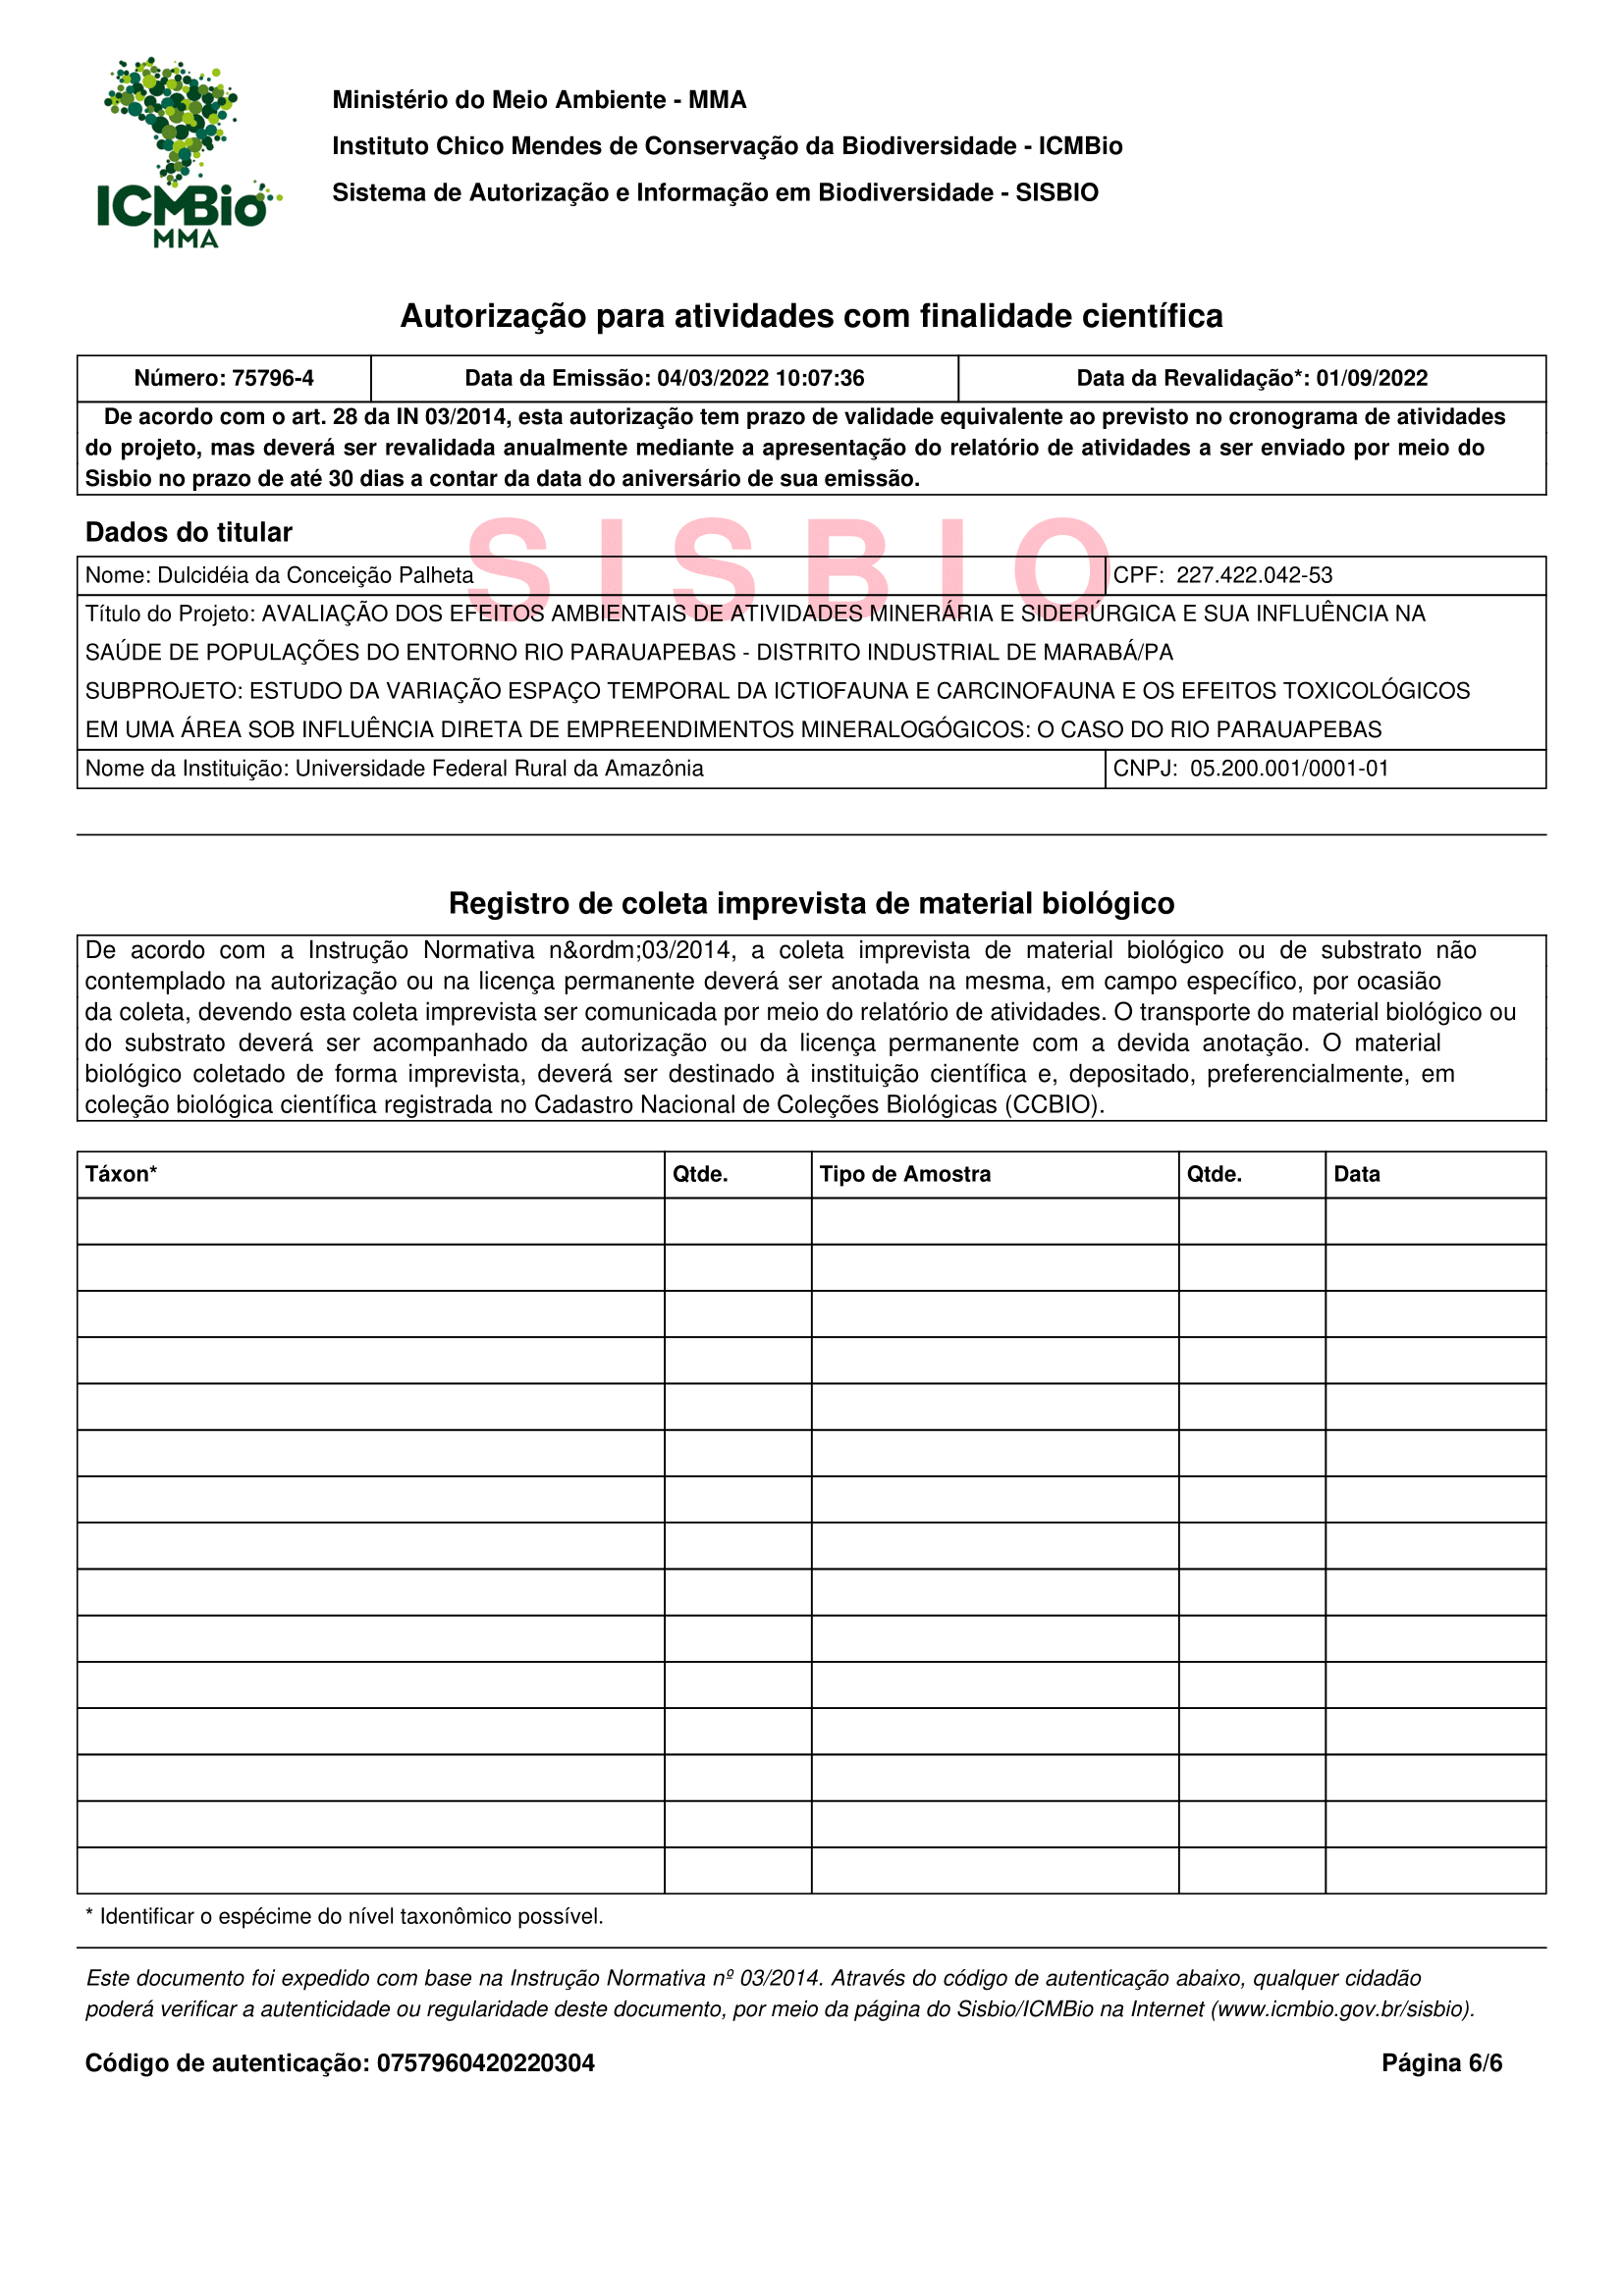


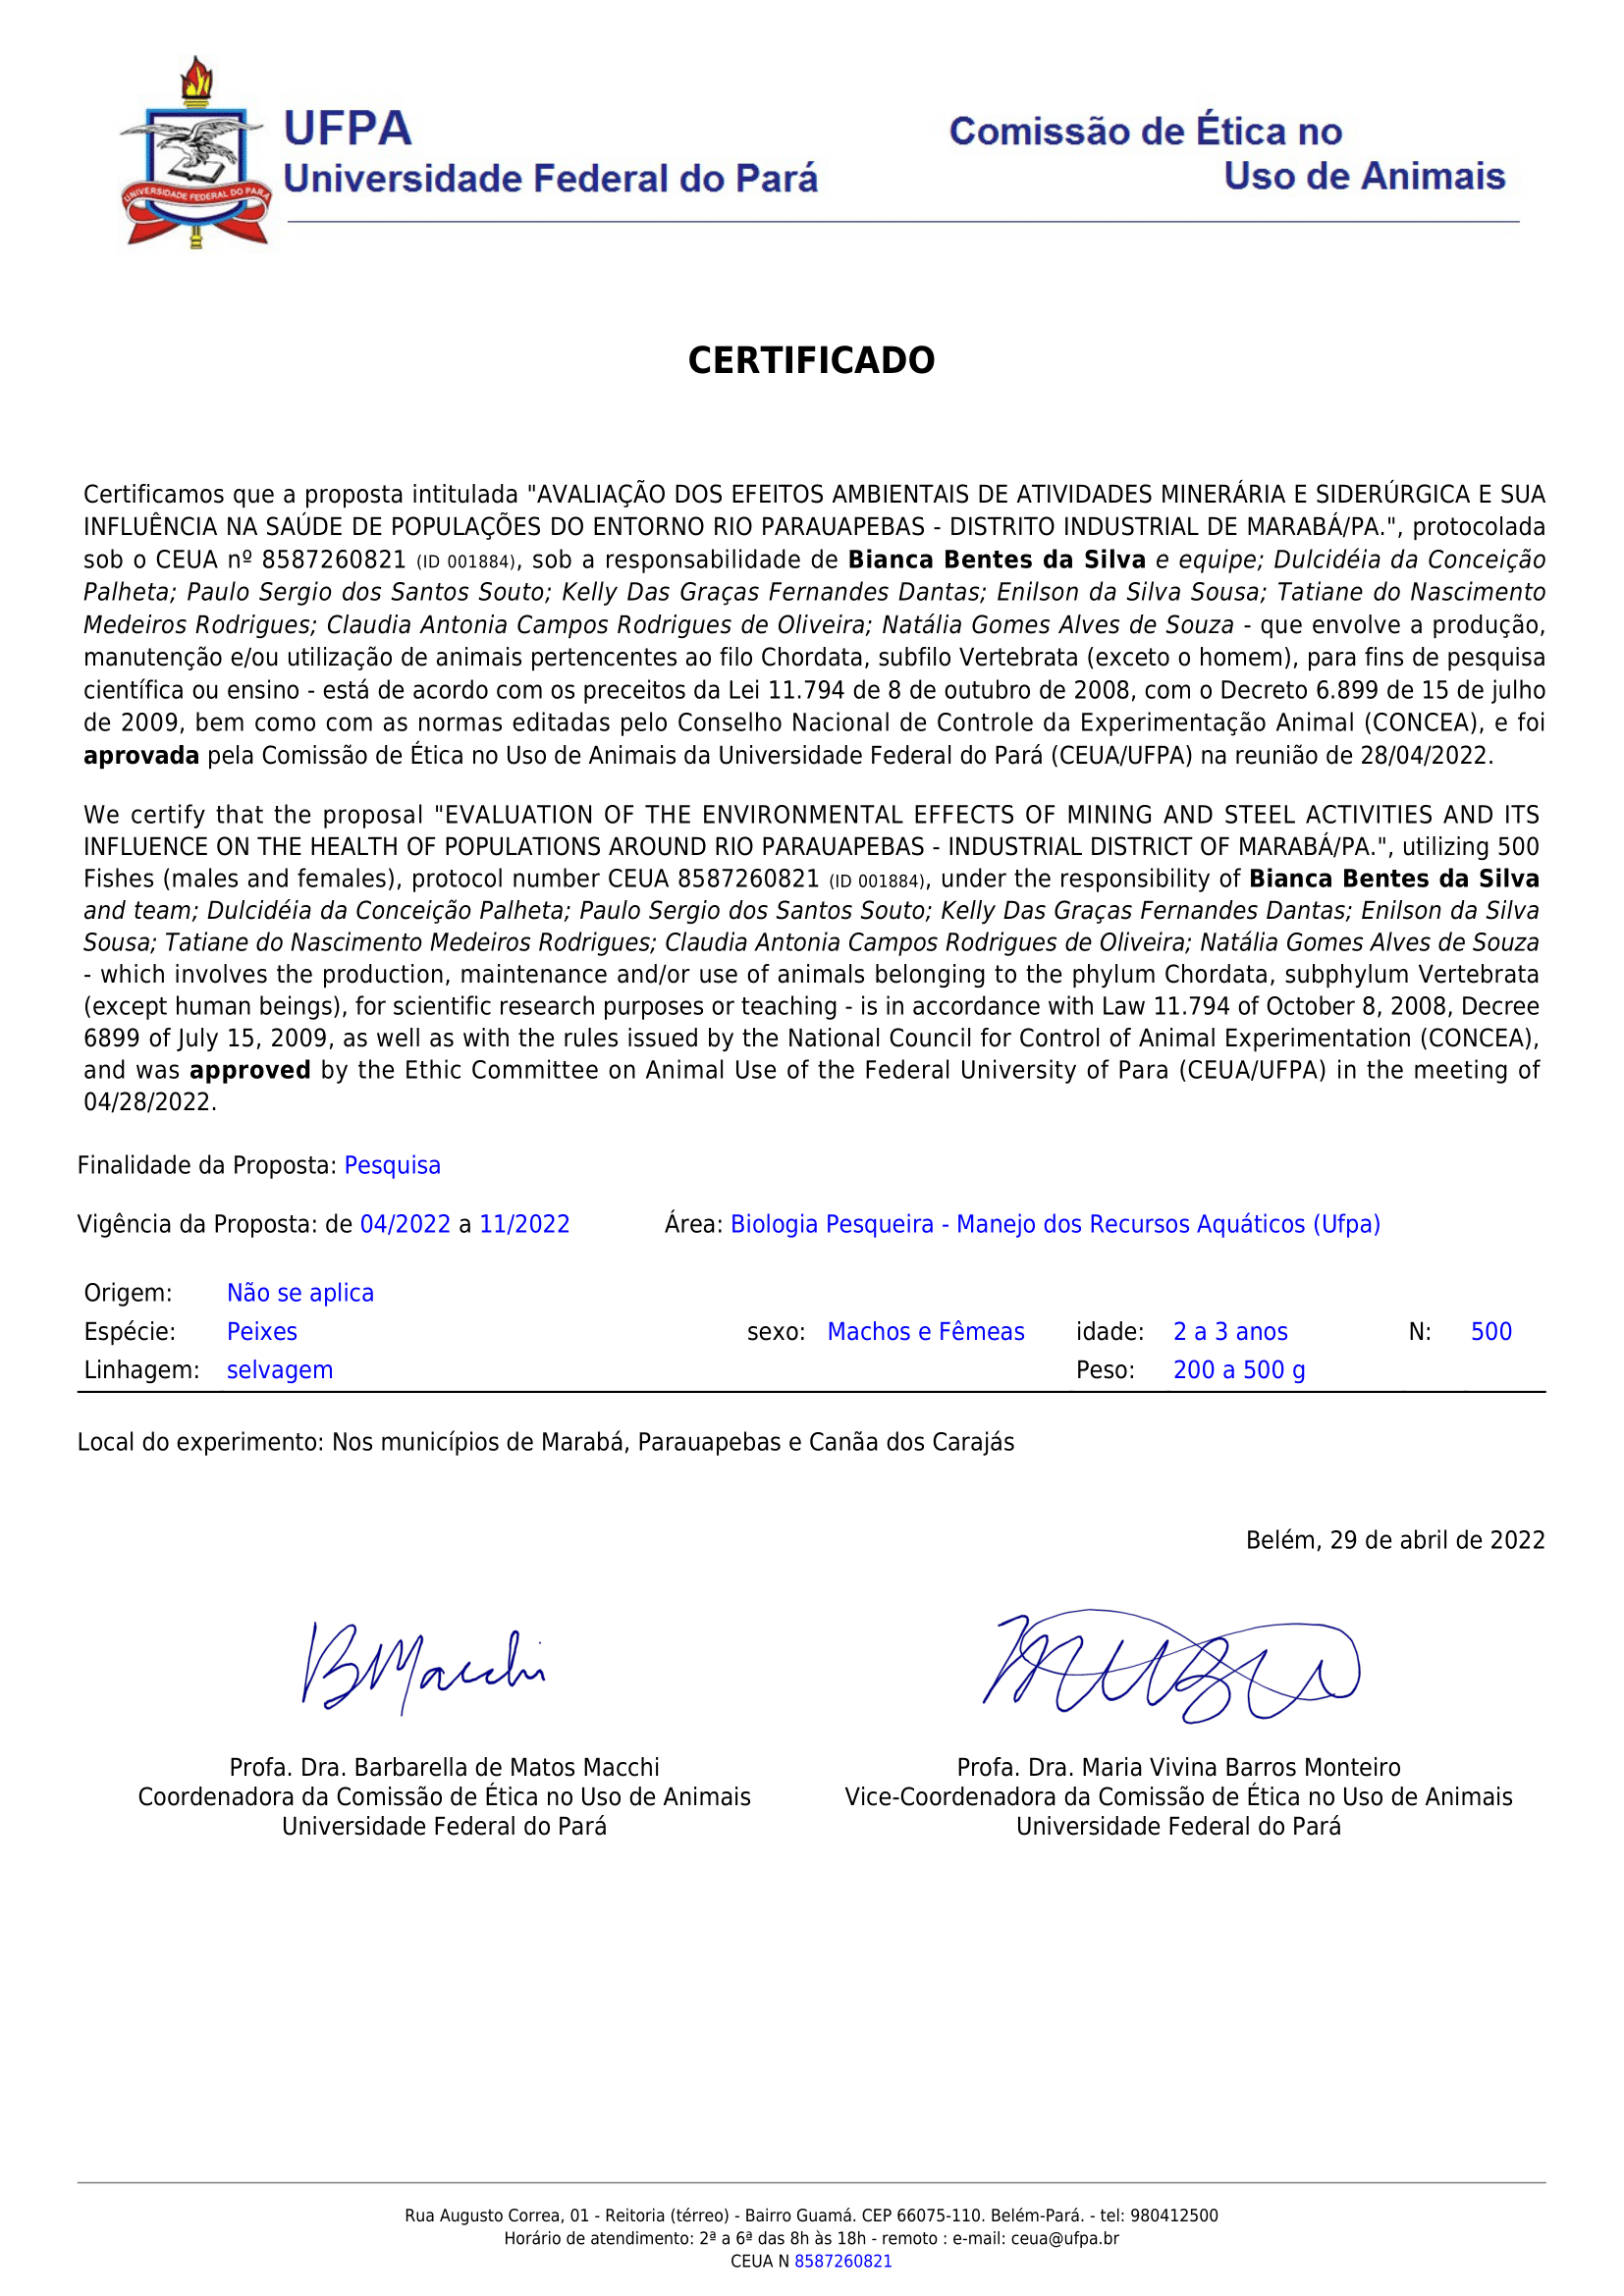
Supplementary S7. Certificate from the Ethics Committee for Animal Use (CEUA)
